# Supplementary material
Source: PubMed Central journal article supplement (PMC8781262)

**Disclosure Purpose:** 21-15481

### Summary of Interests

I do not have any interests to disclose at this time.

### Additional Questions:

- Are there other relationships or activities that readers could perceive to have influenced, or that give the appearance of potentially influencing, what you wrote in the submitted work?**  
No.
- What is the manuscript title?**  
Duration of Protection of COVID-19 Vaccines Against Mild and Severe Disease.
- Are you the corresponding author?**  
No.

### Certification

I certify that the information provided in this disclosure is complete and accurate.

**Disclosure Purpose:** 21-15481

### Summary of Interests

I do not have any interests to disclose at this time.

### Additional Questions:

- Are there other relationships or activities that readers could perceive to have influenced, or that give the appearance of potentially influencing, what you wrote in the submitted work?**  
No.
- What is the manuscript title?**  
Duration of Protection of COVID-19 Vaccines Against Mild and Severe Disease
- Are you the corresponding author?**  
No.

### Certification

I certify that the information provided in this disclosure is complete and accurate.

**Disclosure Purpose:** 21-15481

**Summary of Interests**

I do not have any interests to disclose at this time.

**Additional Questions:**

- 1. **Are there other relationships or activities that readers could perceive to have influenced, or that give the appearance of potentially influencing, what you wrote in the submitted work?**  
No.
- 2. **What is the manuscript title?**  
Duration of Protection of COVID-19 Vaccines Against Mild and Severe Disease
- 3. **Are you the corresponding author?**  
No.

**Certification**

I certify that the information provided in this disclosure is complete and accurate.

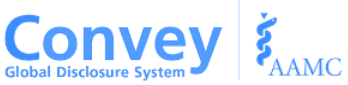

**Disclosure Purpose:** 21-15481

### Summary of Interests

I do not have any interests to disclose at this time.

### Additional Questions:

- Are there other relationships or activities that readers could perceive to have influenced, or that give the appearance of potentially influencing, what you wrote in the submitted work?**  
No.
- What is the manuscript title?**  
Duration of Protection of COVID-19 Vaccines Against Mild and Severe Disease
- Are you the corresponding author?**  
No.

### Certification

I certify that the information provided in this disclosure is complete and accurate.

**Disclosure Purpose:** 21-15481

**Summary of Interests**

I do not have any interests to disclose at this time.

**Additional Questions:**

- 1. **Are there other relationships or activities that readers could perceive to have influenced, or that give the appearance of potentially influencing, what you wrote in the submitted work?**  
No.
- 2. **What is the manuscript title?**  
Duration of Protection of COVID-19 Vaccines Against Mild and Severe Disease
- 3. **Are you the corresponding author?**  
No.

**Certification**

I certify that the information provided in this disclosure is complete and accurate.

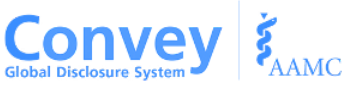

Disclosure Purpose: 21-15481

Summary of Interests

**Company or Organization**

| Entity          | Type             | Interest Held By               |
|-----------------|------------------|--------------------------------|
| GlaxoSmithKline | Grant / Contract | Other - employing organisation |

*Recipient Name:* public health england  
*Grant / Contract Description:* Seasonal influenza - Zanamivir  
*Additional Information:* My employer's predecessor organisation Public Health England has received funding from GSK. for a research project related to analysis of observational data for seasonal influenza and antiviral treatment (zanamivir). This preceded and had no relation to COVID-19. However, i have had no personal role in this work or received any funding from this project.

*Recipient Type:* Institution  
*Grant / Contract Purpose:* Research

Additional Questions:

- Are there other relationships or activities that readers could perceive to have influenced, or that give the appearance of potentially influencing, what you wrote in the submitted work?**  
No.
- What is the manuscript title?**  
Duration of Protection of COVID-19 Vaccines Against Mild and Severe Disease
- Are you the corresponding author?**  
No.

Certification

I certify that the information provided in this disclosure is complete and accurate.

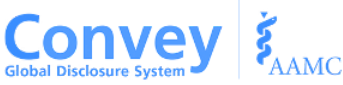

**Disclosure Purpose:** 21-15481

**Summary of Interests**

I do not have any interests to disclose at this time.

**Additional Questions:**

- 1. **Are there other relationships or activities that readers could perceive to have influenced, or that give the appearance of potentially influencing, what you wrote in the submitted work?**  
No.
- 2. **What is the manuscript title?**  
Duration of Protection of COVID-19 Vaccines Against Mild and Severe Disease
- 3. **Are you the corresponding author?**  
No.

**Certification**

I certify that the information provided in this disclosure is complete and accurate.

Disclosure Purpose: 21-15481

Summary of Interests

I do not have any interests to disclose at this time.

Additional Questions:

- 1. **Are there other relationships or activities that readers could perceive to have influenced, or that give the appearance of potentially influencing, what you wrote in the submitted work?**  
No.
- 2. **What is the manuscript title?**  
Duration of Protection of COVID-19 Vaccines Against Mild and Severe Disease
- 3. **Are you the corresponding author?**  
No.

Certification

I certify that the information provided in this disclosure is complete and accurate.





**Disclosure Purpose:** 21-15481

**Summary of Interests**

I do not have any interests to disclose at this time.

**Additional Questions:**

- 1. **Are there other relationships or activities that readers could perceive to have influenced, or that give the appearance of potentially influencing, what you wrote in the submitted work?**  
No.
- 2. **What is the manuscript title?**  
Duration of Protection of Covid-19 Vaccines against Mild and Severe Disease
- 3. **Are you the corresponding author?**  
No.

**Certification**

I certify that the information provided in this disclosure is complete and accurate.

**Disclosure Purpose:** 21-15481

**Summary of Interests**

I do not have any interests to disclose at this time.

**Additional Questions:**

- 1. **Are there other relationships or activities that readers could perceive to have influenced, or that give the appearance of potentially influencing, what you wrote in the submitted work?**  
No.
- 2. **What is the manuscript title?**  
Duration of Protection of COVID-19 Vaccines Against Mild and Severe Disease
- 3. **Are you the corresponding author?**  
No.

**Certification**

I certify that the information provided in this disclosure is complete and accurate.



**Disclosure Purpose:** 21-15481

Summary of Interests

I do not have any interests to disclose at this time.

Additional Questions:

- 1. **Are there other relationships or activities that readers could perceive to have influenced, or that give the appearance of potentially influencing, what you wrote in the submitted work?**  
No.
- 2. **What is the manuscript title?**  
Duration of Protection of COVID-19 Vaccines Against Mild and Severe Disease
- 3. **Are you the corresponding author?**  
No.

Certification

I certify that the information provided in this disclosure is complete and accurate.



**Disclosure Purpose:** 21-15481

**Summary of Interests**

I do not have any interests to disclose at this time.

**Additional Questions:**

- 1. **Are there other relationships or activities that readers could perceive to have influenced, or that give the appearance of potentially influencing, what you wrote in the submitted work?**  
No.
- 2. **What is the manuscript title?**  
Duration of Protection of COVID-19 Vaccines Against Mild and Severe Disease
- 3. **Are you the corresponding author?**  
No.

**Certification**

I certify that the information provided in this disclosure is complete and accurate.

**Disclosure Purpose:** 21-15481

**Summary of Interests**

I do not have any interests to disclose at this time.

**Additional Questions:**

- 1. **Are there other relationships or activities that readers could perceive to have influenced, or that give the appearance of potentially influencing, what you wrote in the submitted work?**  
No.
- 2. **What is the manuscript title?**  
Duration of protection of BNT162b2ChAdOx1-SmRNA-1273COVID-19 vaccines against mild and severe disease in England
- 3. **Are you the corresponding author?**  
No.

**Certification**

I certify that the information provided in this disclosure is complete and accurate.



**Disclosure Purpose:** 21-15481

## Summary of Interests

I do not have any interests to disclose at this time.

## Additional Questions:

1. **Are there other relationships or activities that readers could perceive to have influenced, or that give the appearance of potentially influencing, what you wrote in the submitted work?**

No.

2. **What is the manuscript title?**

Duration of Protection of COVID-19 Vaccines Against Mild and Severe Disease

3. **Are you the corresponding author?**

Yes.

a. **Please list the other authors' names here.**

Nick Andrews<sup>1,2</sup>, Charlotte Gower<sup>1</sup>, Eileen Gallagher<sup>1</sup>, Lara Utsi<sup>1</sup>, Ruth Simmons<sup>1</sup>, Simon Thelwall<sup>1</sup>, Julia Stowe<sup>1</sup>, Elise Tessier<sup>1</sup>, Natalie Groves<sup>1</sup>, Gavin Dabrera<sup>1</sup>, Richard Myers<sup>1</sup>, Colin Campbell<sup>1,2</sup>, Gayatri Amirthalingam<sup>1,2</sup>, Matt Edmunds<sup>1</sup>, Maria Zambon<sup>1,3</sup>, Kevin Brown<sup>1,2</sup>, Susan Hopkins<sup>1,4</sup>, Meera Chand<sup>1,5</sup>, Mary Ramsay, Freja Kirsebom

## Certification

I certify that the information provided in this disclosure is complete and accurate.

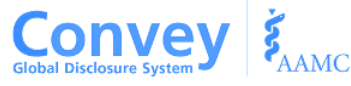

**Disclosure Purpose:** 21-15481

**Summary of Interests**

I do not have any interests to disclose at this time.

**Additional Questions:**

- Are there other relationships or activities that readers could perceive to have influenced, or that give the appearance of potentially influencing, what you wrote in the submitted work?**  
No.
- What is the manuscript title?**  
Duration of Protection of COVID-19 Vaccines Against Mild and Severe Disease
- Are you the corresponding author?**  
No.

**Certification**

I certify that the information provided in this disclosure is complete and accurate.

**Disclosure Purpose:** 21-15481

**Summary of Interests**

I do not have any interests to disclose at this time.

**Additional Questions:**

- Are there other relationships or activities that readers could perceive to have influenced, or that give the appearance of potentially influencing, what you wrote in the submitted work?**  
No.
- What is the manuscript title?**  
Duration of Protection of COVID-19 Vaccines Against Mild and Severe Disease
- Are you the corresponding author?**  
No.

**Certification**

I certify that the information provided in this disclosure is complete and accurate.



**Disclosure Purpose:** 21-15481

**Summary of Interests**

I do not have any interests to disclose at this time.

**Additional Questions:**

- 1. **Are there other relationships or activities that readers could perceive to have influenced, or that give the appearance of potentially influencing, what you wrote in the submitted work?**  
No.
- 2. **What is the manuscript title?**  
Duration of Protection of COVID-19 Vaccines Against Mild and Severe Disease
- 3. **Are you the corresponding author?**  
No.

**Certification**

I certify that the information provided in this disclosure is complete and accurate.



**Disclosure Purpose:** 21-15481

### Summary of Interests

I do not have any interests to disclose at this time.

### Additional Questions:

- Are there other relationships or activities that readers could perceive to have influenced, or that give the appearance of potentially influencing, what you wrote in the submitted work?**  
No.
- What is the manuscript title?**  
Duration of Protection of COVID-19 Vaccines Against Mild and Severe Disease
- Are you the corresponding author?**  
No.

### Certification

I certify that the information provided in this disclosure is complete and accurate.

**Disclosure Purpose:** 21-15481

**Summary of Interests**

I do not have any interests to disclose at this time.

**Additional Questions:**

- 1. **Are there other relationships or activities that readers could perceive to have influenced, or that give the appearance of potentially influencing, what you wrote in the submitted work?**  
No.
- 2. **What is the manuscript title?**  
Duration of Protection of COVID-19 Vaccines Against Mild and Severe Disease
- 3. **Are you the corresponding author?**  
No.

**Certification**

I certify that the information provided in this disclosure is complete and accurate.

**Disclosure Purpose:** 21-15481

**Summary of Interests**

I do not have any interests to disclose at this time.

**Additional Questions:**

- 1. **Are there other relationships or activities that readers could perceive to have influenced, or that give the appearance of potentially influencing, what you wrote in the submitted work?**  
No.
- 2. **What is the manuscript title?**  
Duration of Protection of COVID-19 Vaccines Against Mild and Severe Disease
- 3. **Are you the corresponding author?**  
No.

**Certification**

I certify that the information provided in this disclosure is complete and accurate.

Disclosure Purpose: 21-15481

Summary of Interests

**Company or Organization**

| Entity                                                                                                                                             | Type              | Interest Held By                                           |
|----------------------------------------------------------------------------------------------------------------------------------------------------|-------------------|------------------------------------------------------------|
| <a href="#">International Society for Influenza and other Respiratory Virus Diseases (ISIRV)</a>                                                   | Fiduciary Officer | Self                                                       |
| <i>Official Title:</i> Chair of ISIRV                                                                                                              |                   | <i>Position Description:</i> Chair position on ISIRV board |
| <i>Additional Information:</i> Charitable organisation, registered charity in the UK. Unremunerated position. Member of the board since 2016/2017. |                   |                                                            |

Additional Questions:

- Are there other relationships or activities that readers could perceive to have influenced, or that give the appearance of potentially influencing, what you wrote in the submitted work?**  
No.
- What is the manuscript title?**  
Duration of Protection of COVID-19 Vaccines Against Mild and Severe Disease
- Are you the corresponding author?**  
No.

Certification

I certify that the information provided in this disclosure is complete and accurate.

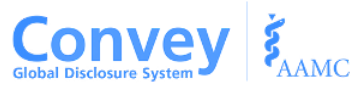

Supplement: NEJMoa2115481_disclosures.pdf [file NEJMoa2115481_disclosures.pdf]
