# Supplementary material
Source: PubMed Central journal article supplement (PMC8781262)
Supplement: NEJMoa2115481_appendix.pdf [file NEJMoa2115481_appendix.pdf]

## Supplementary Appendix

Supplement to: Andrews N, Tessier E, Stowe J, et al. Duration of protection against mild and severe disease by Covid-19 vaccines. *N Engl J Med*. DOI: 10.1056/NEJMoa2115481

This appendix has been provided by the authors to give readers additional information about the work.

## Table of Contents

|                                                                                                                                                                                                                   |    |
|-------------------------------------------------------------------------------------------------------------------------------------------------------------------------------------------------------------------|----|
| Supplementary Section 1: Methods .....                                                                                                                                                                            | 2  |
| Study Design .....                                                                                                                                                                                                | 2  |
| Data Sources .....                                                                                                                                                                                                | 2  |
| Statistical analysis .....                                                                                                                                                                                        | 4  |
| Missing data .....                                                                                                                                                                                                | 4  |
| Supplementary Section 2: Tables and Figures .....                                                                                                                                                                 | 5  |
| Table S1. Assignment of positives cases to Alpha and Delta analyses .....                                                                                                                                         | 5  |
| Table S2. Analysis sets by age and outcomes .....                                                                                                                                                                 | 6  |
| Table S3. Descriptive characteristics of all tests by NIMS linkage status. ....                                                                                                                                   | 8  |
| Table S4. Descriptive characteristics of positive and negative test results in individuals tested for SARS-CoV-2 in England for the study population .....                                                        | 9  |
| Table S5. Counts by variant, hospitalisations and deaths for positive SARS-CoV-2 tests among individuals in England for the study population. ....                                                                | 11 |
| Table S6. Vaccine effectiveness against Alpha and Delta symptomatic disease, hospitalisation and death for BNT162b2, ChAdOx1-S and mRNA-1273 in England.....                                                      | 12 |
| Table S7. Number of cases and controls (cases; controls) contributing to vaccine effectiveness estimates as shown in Supplementary Table S4.....                                                                  | 14 |
| Table S8. Logistic regression estimates for all age analysis for Delta cases, hospitalisations and deaths and Hosmer-Lemeshow goodness of fit assessment by deciles of predicted probability of being a case..... | 16 |
| Table S9. Number of cases and controls (cases; controls) contributing to vaccine effectiveness estimates against symptomatic disease as shown in Table 1 and Supplementary Table S10 (mRNA-1273 VE).....          | 19 |
| Table S10. Vaccine effectiveness against Delta symptomatic disease and hospitalisation for mRNA-1273 in England.....                                                                                              | 20 |
| Table S11. Vaccine effectiveness against Alpha symptomatic disease among individuals with two doses of ChAdOx1-S, BNT162b2 in England at 1 week, 2-9 weeks and 10+ weeks.....                                     | 20 |
| Table S12. Vaccine effectiveness against Alpha hospitalisation among individuals with two doses of ChAdOx1-S, BNT162b2 in England at 1 week, 2-9 weeks and 10+ weeks.....                                         | 21 |
| Table S13. Vaccine effectiveness against Alpha deaths among individuals with two doses of BNT162b2 or all vaccines in England at 2+ weeks. ....                                                                   | 21 |
| Table S14. Number of cases and controls (cases; controls) contributing to vaccine effectiveness estimates against hospitalisation as shown in Table 2 and Supplementary Table S10.....                            | 22 |
| Table S15. Number of cases and controls (cases; controls) contributing to vaccine effectiveness estimates against death as shown in Table 3. ....                                                                 | 23 |
| Table S16. Vaccine effectiveness against Delta hospitalisation, using only admissions coded as respiratory admission for ChAdOx1-S and BNT162b2 in England. ....                                                  | 23 |

|                                                                                                                                                                                                                                                               |    |
|---------------------------------------------------------------------------------------------------------------------------------------------------------------------------------------------------------------------------------------------------------------|----|
| Table S17. Vaccine effectiveness against Delta hospitalisation among individuals with two doses of ChAdOx1-S and BNT162b2 mRNA-1273 in England at 1 week, 2-9 weeks, 10 -14 weeks, 15-19 weeks and 20+ weeks, using test negative hospitalised controls. .... | 24 |
| Table S18. Vaccine effectiveness against Delta symptomatic infection stratified by risk group for ChAdOx1-S and BNT162b2.....                                                                                                                                 | 24 |
| Table S19. Number of cases and controls (cases; controls) contributing to vaccine effectiveness estimates against Delta symptomatic infection as shown in Supplementary Table S17. ....                                                                       | 25 |
| Figure S1. Total numbers of cases and controls by week. ....                                                                                                                                                                                                  | 26 |
| Figure S2. Vaccine effectiveness against hospitalization age $\geq 65$ , all vaccines combined for intervals after the second dose with 95% confidence intervals. ....                                                                                        | 26 |
| Figure S3. Vaccine effectiveness against Delta hospitalisation using test negative hospitalised controls, with 95% confidence intervals *.....                                                                                                                | 27 |
| Figure S4. Vaccine effectiveness against Delta hospitalisation (age 40-64 years) by clinical risk group status, with 95% confidence intervals*.....                                                                                                           | 27 |
| Figure S5. Vaccine effectiveness of BNT162b2 against symptomatic disease (Delta variant) in people aged 80+ with either a short ( $\leq 4$ weeks) or long ( $\geq 8$ weeks) interval between first and second doses, with 95% confidence intervals. ....      | 28 |
| Supplementary Section 3: Limitations .....                                                                                                                                                                                                                    | 29 |
| Main potential sources of bias.....                                                                                                                                                                                                                           | 29 |
| Supplementary Section 4: References .....                                                                                                                                                                                                                     | 31 |

## Supplementary Section 1: Methods

### Study Design

We used a test-negative case-control design to estimate vaccine effectiveness of two doses of ChAdOx1-S, BNT162b2 and mRNA-1273 COVID-19 vaccines against PCR-confirmed symptomatic disease, hospitalisation within 14 days of PCR confirmation, and death within 28 days of PCR confirmation. The analysis was stratified to assess vaccine effectiveness against the Delta and Alpha variants over the period that they were circulating. In brief, we compared vaccination status in symptomatic adults with PCR-confirmed SARS-CoV-2 infection for each outcome of interest with vaccination status in adults who reported symptoms but had a negative SARS-CoV-2 PCR test.

### Data Sources

#### ***National Immunisation Management System***

The National Immunisation Management System (NIMS) contains demographic information on the whole population of England who are registered with a GP in England and is used to record all COVID-19 vaccinations. These data were accessed on 04 October 2021. The information used from NIMS was all dates of COVID-19 vaccination, vaccine manufacturer for each dose, date of death and demographic data (see section on covariates).

#### ***COVID-19 testing data***

SARS-CoV-2 Testing Polymerase-chain-reaction (PCR) testing for SARS CoV-2 in the United Kingdom is undertaken by hospital and public health laboratories, as well as by community testing with the use of drive through or at-home testing, which is available to anyone with symptoms consistent with Covid-19 (high temperature, new continuous cough, or loss or change in sense of smell or taste), is a contact of a confirmed case, for care home staff and residents or who has self-tested as positive using a lateral flow device. Regular COVID-19 lateral flow testing is available to all members of the population. Data on all positive PCR tests between 08 December 2020, and 01 October 2021 were extracted. Data on all recorded negative community tests were also extracted for this period. Any negative tests taken within 7 days of a previous negative test, or where symptoms were recorded, with symptoms within 10 days of symptoms for a previous negative test were dropped as these likely represent the same episode. Negative tests taken within 21 days before a positive test were also excluded as there is a high chance of these being false negatives. Participants contributed a maximum of three randomly chosen negative test results in the follow-up period. Data were restricted to persons who had reported symptoms and gave an onset date. Only persons who had undergone testing within 10 days after symptom onset were included in order to account for reduced sensitivity of PCR testing beyond this period. To aim to estimate vaccine effectiveness in fully susceptible people, we excluded all test results with a previous positive PCR or antibody test result for the same individual. Children younger than 16 years of age as of March 31, 2021, were excluded.

#### ***Identification of Variants and assignment of cases to Alpha and Delta analyses***

Sequencing is undertaken at a network of laboratories, including the Wellcome Sanger Institute, where a high proportion of samples have been tested, and whole-genome sequences are assigned to UKHSA definitions of variants based on mutations. Genotyping based on known mutations is also used to identify known variants in addition to full sequencing. Spike gene target status on PCR is a second approach for identifying each variant. Approximately 60% of Pillar 2 Community testing in the UK is carried out by laboratories using the TaqPath assay (Thermo Fisher Scientific) which test for three gene targets: spike (S), nucleocapsid (N), and open reading frame 1ab (ORF1ab). In December 2020, the Alpha variant was noted to be associated with negative testing on the S target, so S target–

negative status was subsequently used as a proxy for identification of the variant. S target-positive status has been used as a proxy for the delta variant since mid-May 2021.<sup>1</sup>

Prior to May 2021, the Alpha variant was the main COVID-19 variant circulating in the UK after which time the Delta variant predominated. Cases were assigned to Alpha or Delta variant first on whole-genome sequencing, second on the spike gene (S-gene) target status third, for cases where sequencing or S-gene testing was not done, based on time-period. Full details of numbers assigned to Alpha and Delta (or neither) by time period are given in Supplementary table S1. The assignment aimed to ensure a high proportion (over 90%) of cases included in the analyses would be the correct variant.

We previously used an earlier cut of this data to estimate the effectiveness of vaccines against the Delta variant compared to the Alpha variant.<sup>2</sup>

### ***Linkage of testing data to NIMS***

Testing data were linked to NIMS on 05 October 2021 using combinations of National Health Service number (a unique identifier for each person receiving medical care in the United Kingdom), date of birth, surname, first name, and postcode using deterministic linkage with >95.5% uniqueness. The percentage linkage success was compared between cases and controls, by demographic features (gender, ethnicity, age) and by period.

### ***Hospital and mortality outcomes in positive cases***

Individuals testing positive were linked to the Emergency Care Dataset (ECDS) on 05 October 2021 using NHS number and date of test. We included emergency care attendances in symptomatic cases within 14 days of the positive test, which were not injury related and resulted in an inpatient admission. ECDS data includes hospital admissions through NHS emergency departments in England but not elective admissions. Only first attendances in the 14-day period were selected if a person had more than one admission from Emergency Care. To allow for delays in the ECDS data flow, only cases and controls tested by 17 September 2021 were included. A sensitivity analysis was conducted using only admissions with COVID-19 or respiratory SNOMED CT codes as described in Public Health England's Emergency department: weekly bulletin.<sup>3</sup>

When assessing effectiveness against death within 28 days of a positive test, data in NIMS on deaths provided by NHS Digital was used which had death registrations up until 03 October 2021. To allow for delays in the deaths data due to registration delays and for all cases to have 28 days follow-up, only cases and controls tested by 03 September 2021 were included.

### ***Covariates***

We extracted sex, date of birth, ethnicity, and geography (NHS region) from the testing data. The linked NIMS data were used to determine index of multiple deprivation from addresses and this also contained flags to identify those who were clinically vulnerable (CEV), in a clinical risk group (at risk), a healthcare worker, and a care home resident. Further details of these flags are given below.

- CEV flag: this is provided by NHS Digital and is a record of vulnerable patients thought to be at high risk of complications from COVID-19.<sup>4</sup> This CEV flag was updated at a number of time points since the end of November 2020 and individuals were counted as CEV if they had this flag at any time point.

- At risk flag: this is provided by NHS Digital and is based on a list of NHS numbers extracted from the Electronic Health Record (EHR) based on the national SNOMED coded specification. This includes between 16 and 65 years of age who are in a clinical risk group and also those coded as a carer within the Electronic Staff Record (ESR).<sup>5</sup>
- Healthcare worker (HCW) flag: this is provided by the NHS Business Services Authority for all staff who are directly employed by the NHS organizations using the ESR.
- Care home resident flag: this is generated from the NHS England and Improvement Master Patient Index and uses a Unique Property Reference Numbers and NHS-addresses linked to care home Care Quality Commission addresses. An Individual is given this flag if they have ever lived in a care home since the beginning of the vaccine programme and is updated monthly.

### **Statistical analysis**

Analysis was by logistic regression with the PCR test result as the dependent variable where those testing positive are cases and those testing negative controls. In analyses for hospitalization and death those testing positive and being hospitalized or testing positive and dying were cases and those testing negative were controls. Vaccination status was included as an independent variable and effectiveness defined as 1- odds of vaccination in cases/odds of vaccination in controls. Vaccine effectiveness was adjusted in logistic regression models for age, sex, index of multiple deprivation, ethnic group, care home residence status (for analyses including adults aged  $\geq 65$  years), geographic region, period (calendar week), health and social care worker status (for analyses with adults aged  $< 65$  years), and clinical risk group (only available for  $< 65$  year-olds) or a clinically extremely vulnerable group (any age). For deaths, the period was modelled using a cubic spline due to smaller numbers. These factors were also considered potential confounders so were included in all models.

Analyses were stratified by age-group according to the timing of vaccination in the general population as described in Supplementary table S2 and Supplementary table S4. Within age 65 years and above the analyses were also further stratified for those flagged as being in a clinically extremely vulnerable and within age 40-64 for those flagged as being either clinically extremely vulnerable or in a risk group.

Vaccine effectiveness was assessed for each vaccine and by intervals after vaccination of at least 28 days' post first dose, and at least 14 days post second dose. To assess potential waning, intervals of 1 week (7-13 days), 2-9 weeks, 10-14 weeks, 15-19 weeks and over 20 weeks post second dose were used. For the earliest vaccinated groups, (65+ year olds) the last period was further stratified into 20-24 and 25+ weeks. An additional analysis was done in the 80 years and older group according to interval between doses ( $\leq 28$  days,  $\geq 56$  days) for the hospitalisation outcome. Where sample size was very small and VE estimates highly imprecise, estimates are not presented. This mainly affected the 1-week interval after the second dose and for longer intervals after the second dose effectiveness against Alpha and in younger ages effectiveness against Delta. Waning was not assessed for age 16-39 as there was insufficient follow-up time in this group.

### **Missing data**

There was very little missing data in the final dataset with 0.11% missing gender,  $< 0.01\%$  missing region. 7.1% were missing IMD due to missing address details. These data were dropped from the analysis.

**Supplementary Section 2: Tables and Figures**

**Table S1. Assignment of positives cases to Alpha and Delta analyses**

| Week year  | Variant sequenced/ S-gene status |          |          |            |             |             |            |             |             |            |             |             |
|------------|----------------------------------|----------|----------|------------|-------------|-------------|------------|-------------|-------------|------------|-------------|-------------|
|            | nk / nk                          | nk / pos | nk / neg | other / nk | other / pos | other / neg | Alpha / nk | Alpha / pos | Alpha / neg | Delta / nk | Delta / pos | Delta / neg |
| 50-53 2020 | 2760                             | 793      | 1144     | 3          | 35          | 1           | 17         | 0           | 46          | 0          | 0           | 0           |
| 1-14 2021  | 228749                           | 24508    | 222905   | 455        | 2651        | 218         | 12952      | 49          | 62001       | 12         | 10          | 0           |
| 15-17 2021 | 1726                             | 82       | 1247     | 79         | 90          | 13          | 1218       | 2           | 5595        | 139        | 410         | 0           |
| 18-20 2021 | 2609                             | 446      | 355      | 68         | 81          | 14          | 1304       | 0           | 2573        | 474        | 3191        | 2           |
| 21-25 2021 | 24674                            | 36349    | 677      | 97         | 27          | 7           | 799        | 3           | 1106        | 11569      | 21396       | 5           |
| 26-39 2021 | 431901                           | 484231   | 380      | 1069       | 983         | 0           | 30         | 0           | 25          | 48328      | 62050       | 10          |

|                                     |
|-------------------------------------|
| Included as Alpha                   |
| Included as Delta                   |
| Other/not known                     |
| Period not included for that strain |

**Notes**

Over all weeks 71346/71616 (99.6%) of S-gene negatives that were sequenced were Alpha so S-gene negative is highly predictive of Alpha.  
 From weeks 15 to 39 87047/88233 (98.7%) of S-gene positives that were sequenced were Delta, so in this period S-gene positive is highly predictive of Delta  
 In weeks 50-53 59% were S-gene negative when done so not known S-gene/sequencing could not be assigned  
 In weeks 1-17 91% were S-gene negative when done so not knowns were assigned Alpha  
 In weeks 21-39 99% were S-gene positive when done so not known S-gene/sequencing could be assigned as Delta

**Table S2. Analysis sets by age and outcomes**

| Age at March 31st 2021 | Case outcome (all control outcomes are symptomatic infection) | Period for cases / controls included (Alpha)* | Period for cases/controls included (Delta)**     | Period in which first vaccination dose is given if vaccinated at onset |
|------------------------|---------------------------------------------------------------|-----------------------------------------------|--------------------------------------------------|------------------------------------------------------------------------|
| 80+                    | Symptomatic infection                                         | Onset 08 Dec 2020 – 27 Jun 2021               | Onset from 12 Apr 2021 and tested by 01 Oct 2021 | 08 Dec 2020 – 03 Jan 2021                                              |
|                        | Hospitalisation within 14 days of test in a symptomatic case  | Onset 08 Dec 2020 – 27 Jun 2021               | Onset from 12 Apr 2021 and tested by 17 Sep 2021 | 08 Dec 2020 – 03 Jan 2021                                              |
| 65+                    | Symptomatic infection                                         | Onset 04 Jan 2021 – 27 Jun 2021               | Onset from 12 Apr 2021 and tested by 01 Oct 2021 | 04 Jan 2021 onwards                                                    |
|                        | Hospitalisation within 14 days of test in a symptomatic case  | Onset 04 Jan 2020 – 27 Jun 2021               | Onset from 12 Apr 2021 and tested by 17 Sep 2021 | 04 Jan 2021 onwards                                                    |
|                        | Death within 28 days of test in a symptomatic case            | Onset 04 Jan 2021 – 27 Jun 2021               | Onset from 12 Apr 2021 and tested by 03 Sep 2021 | 04 Jan 2021 onwards                                                    |
| 40-64                  | Symptomatic infection                                         | Onset 01 Feb 2021-27 Jun 2021                 | Onset from 12 Apr 2021 and tested by 01 Oct 2021 | Feb 1 2021 onwards                                                     |
|                        | Hospitalisation within 14 days of test in a symptomatic case  | Onset 01 Feb 2021-27 Jun 2021                 | Onset from 12 Apr 2021 and tested by 17 Sep 2021 | Feb 1 2021 onwards                                                     |
| 16-39                  | Symptomatic infection                                         | Onset 10 May 2020-27 Jun 2021                 | Onset from 10 May 2021 and tested by 01 Oct 2021 | 10 May 2021 onwards                                                    |
|                        | Hospitalisation within 14 days of test in a symptomatic case  | Onset 10 May 2020-27 Jun 2021                 | Onset from 10 May 2021 and tested by 17 Sep 2021 | 10 May 2021 onwards                                                    |
| 16+ (All)              | Symptomatic infection                                         | Onset 04 Jan 2021 – 27 Jun 2021               | Onset from 12 Apr 2021 and tested by 01 Oct 2021 | 04 Jan 2021 onwards                                                    |



|  |                                        |                                                                           |                                                  |                                                                        |
|--|----------------------------------------|---------------------------------------------------------------------------|--------------------------------------------------|------------------------------------------------------------------------|
|  | Hospitalisation within 14 days of test | Onset 04 Jan 2020 – 27 Jun 2021                                           | Onset from 12 Apr 2021 and tested by 17 Sep 2021 | 04 Jan 2021 onwards                                                    |
|  | Death within 28 days of test           | Onset 04 Jan 2021 – 27 Jun 2021 or for 80+ cohort 08 Dec 2021-27 Jun 2021 | Onset from 12 Apr 2021 and tested by 03 Sep 2021 | 04 Jan 2021 onwards if aged <80 or 08 Dec 2021-03 Jan 2021 if aged 80+ |

\*27 Jun is for test negative controls and test positive cases if sequencing or s-gene target failure is done, otherwise 02 May is used before which >80% of those tested positive were Alpha

\*\*12 Apr is for test negative controls and test positive cases if sequencing or s-gene target failure is done , otherwise 24 May is used after which >80% of those tested positive were Delta

**Table S3. Descriptive characteristics of all tests by NIMS linkage status.**

|                  |                                 | Unlinked to NIMS |      | Linked to NIMS |      |
|------------------|---------------------------------|------------------|------|----------------|------|
|                  |                                 | n                | %    | n              | %    |
|                  | <b>Total</b>                    | 1,050,309        | 14.8 | 6,056,673      | 85.2 |
| <b>Gender</b>    | Male                            | 572,795          | 54.5 | 2,633,816      | 43.5 |
|                  | Female                          | 473,591          | 45.1 | 3,416,100      | 56.4 |
| <b>Ethnicity</b> | African                         | 29,989           | 2.9  | 92,316         | 1.5  |
|                  | Another Asian background        | 17,415           | 1.7  | 77,226         | 1.3  |
|                  | Another Black background        | 4,040            | 0.4  | 10,499         | 0.2  |
|                  | Another ethnic background       | 14,705           | 1.4  | 45,239         | 0.7  |
|                  | Arab                            | 7,762            | 0.7  | 25,265         | 0.4  |
|                  | Bangladeshi                     | 8,426            | 0.8  | 51,923         | 0.9  |
|                  | Caribbean                       | 13,008           | 1.2  | 49,111         | 0.8  |
|                  | Chinese                         | 6,352            | 0.6  | 29,570         | 0.5  |
|                  | Indian                          | 32,393           | 3.1  | 211,308        | 3.5  |
|                  | Mixed or multiple ethnic groups | 31,741           | 3.0  | 128,913        | 2.1  |
|                  | Pakistani                       | 25,952           | 2.5  | 155,139        | 2.6  |
|                  | Prefer not to say               | 63,525           | 6.0  | 200,627        | 3.3  |
|                  | White                           | 795,001          | 75.7 | 4,979,537      | 82.2 |
| <b>Region</b>    | East of England                 | 105,487          | 10.0 | 663,816        | 11.0 |
|                  | London                          | 194,746          | 18.5 | 866,349        | 14.3 |
|                  | Midlands                        | 191,947          | 18.3 | 1,173,103      | 19.4 |
|                  | North East and Yorkshire        | 161,081          | 15.3 | 1,016,867      | 16.8 |
|                  | North West                      | 150,394          | 14.3 | 865,738        | 14.3 |
|                  | South East                      | 149,075          | 14.2 | 887,941        | 14.7 |
|                  | South West                      | 97,561           | 9.3  | 582,847        | 9.6  |

**Table S4. Descriptive characteristics of positive and negative test results in individuals tested for SARS-CoV-2 in England for the study population.\***

|                           |                                           | Overall          |              | Positive         |              | Negative         |              |
|---------------------------|-------------------------------------------|------------------|--------------|------------------|--------------|------------------|--------------|
|                           |                                           | n                | %            | n                | %            | n                | %            |
| <b>Test Result</b>        |                                           | <b>6,056,673</b> | <b>100.0</b> | <b>1,706,743</b> | <b>28.2%</b> | <b>4,349,930</b> | <b>71.8%</b> |
| <b>Vaccination status</b> | Unvaccinated                              | 855,743          | 14.1%        | 358,682          | 21.0%        | 497,061          | 11.4%        |
|                           | ChAdOx1-S 1 dose                          | 76,420           | 1.3%         | 23,846           | 1.4%         | 52,574           | 1.2%         |
|                           | ChAdOx1-S 2 doses                         | 2,376,037        | 39.2%        | 642,003          | 37.6%        | 1,734,034        | 39.9%        |
|                           | BNT162b2 1 dose                           | 393,425          | 6.5%         | 155,353          | 9.1%         | 238,072          | 5.5%         |
|                           | BNT162b2 2 doses                          | 2,133,769        | 35.2%        | 474,035          | 27.8%        | 1,659,734        | 38.2%        |
|                           | mRNA-12731 dose                           | 32,875           | 0.5%         | 12,309           | 0.7%         | 20,566           | 0.5%         |
|                           | mRNA-12732 doses                          | 176,235          | 2.9%         | 37,695           | 2.2%         | 138,540          | 3.2%         |
|                           | Mixed course or dose1-2 interval <19 days | 12169            | 0.2%         | 2,820            | 0.2%         | 9,349            | 0.2%         |
| <b>Age Group</b>          | 80+                                       | 74,289           | 1.2%         | 22,412           | 1.3%         | 51,877           | 1.2%         |
|                           | 65-79                                     | 329,812          | 5.4%         | 85,951           | 5.0%         | 243,861          | 5.6%         |
|                           | 40-64                                     | 2,269,993        | 37.5%        | 625,278          | 36.6%        | 1,644,715        | 37.8%        |
|                           | 16-39                                     | 3,382,579        | 55.8%        | 973,102          | 57.0%        | 2,409,477        | 55.4%        |
| <b>Gender</b>             | Female                                    | 3,416,100        | 56.4%        | 884,254          | 51.8%        | 2,531,846        | 58.2%        |
|                           | Male                                      | 2,633,816        | 43.5%        | 820,477          | 48.1%        | 1,813,339        | 41.7%        |
|                           | Missing                                   | 6,757            | 0.1%         | 2,012            | 0.1%         | 4,745            | 0.1%         |
| <b>Ethnicity</b>          | African                                   | 92,316           | 1.5%         | 29,719           | 1.7%         | 62,597           | 1.4%         |
|                           | Another Asian background                  | 77,226           | 1.3%         | 23,730           | 1.4%         | 53,496           | 1.2%         |
|                           | Another Black background                  | 10,499           | 0.2%         | 3,526            | 0.2%         | 6,973            | 0.2%         |
|                           | Another ethnic background                 | 45,239           | 0.7%         | 12,532           | 0.7%         | 32,707           | 0.8%         |
|                           | Arab                                      | 25,265           | 0.4%         | 7,192            | 0.4%         | 18,073           | 0.4%         |
|                           | Bangladeshi                               | 51,923           | 0.9%         | 19,343           | 1.1%         | 32,580           | 0.7%         |
|                           | Caribbean                                 | 49,111           | 0.8%         | 18,743           | 1.1%         | 30,368           | 0.7%         |
|                           | Chinese                                   | 29,570           | 0.5%         | 6,185            | 0.4%         | 23,385           | 0.5%         |
|                           | Indian                                    | 211,308          | 3.5%         | 58,670           | 3.4%         | 152,638          | 3.5%         |
|                           | Mixed or multiple ethnic groups           | 128,913          | 2.1%         | 38,254           | 2.2%         | 90,659           | 2.1%         |
| Pakistani                 | 155,139                                   | 2.6%             | 51,696       | 3.0%             | 103,443      | 2.4%             |              |

|                   |                   |           |       |           |       |           |       |
|-------------------|-------------------|-----------|-------|-----------|-------|-----------|-------|
|                   | Prefer not to say | 200,627   | 3.3%  | 57,288    | 3.4%  | 143,339   | 3.3%  |
|                   | White             | 4,979,537 | 82.2% | 1,379,865 | 80.8% | 3,599,672 | 82.8% |
| <b>NHS Region</b> | East of England   | 663,816   | 11.0% | 171,149   | 10.0% | 492,667   | 11.3% |
|                   | London            | 866,349   | 14.3% | 233,730   | 13.7% | 632,619   | 14.5% |
|                   | Midlands          | 1,173,103 | 19.4% | 349,557   | 20.5% | 823,546   | 18.9% |
|                   | North East        | 1,016,867 | 16.8% | 321,589   | 18.8% | 695,278   | 16.0% |
|                   | North West        | 865,738   | 14.3% | 266,965   | 15.6% | 598,773   | 13.8% |
|                   | South East        | 887,941   | 14.7% | 219,904   | 12.9% | 668,037   | 15.4% |
|                   | South West        | 582,847   | 9.6%  | 143,845   | 8.4%  | 439,002   | 10.1% |
|                   | Unknown           | 12        | 0.0%  | 4         | 0.0%  | 8         | 0.0%  |

\*aged 80 and above and either unvaccinated at the time of onset or first vaccinated before January 4th, 2021 with onset December 8th, 2020-September 3rd, 2021 or aged 16 and above and unvaccinated prior to January 4th, 2021 with onset January 4th 2021-September 3rd, 2021.

**Table S5. Counts by variant, hospitalisations and deaths for positive SARS-CoV-2 tests among individuals in England for the study population.**

|                |                                   | <b>All</b> | <b>16-39</b> | <b>40-64</b> | <b>65-79</b> | <b>80+</b> |
|----------------|-----------------------------------|------------|--------------|--------------|--------------|------------|
| <b>Variant</b> | <b>Alpha</b>                      | 544,468    | 260,843      | 242,057      | 31,798       | 9,770      |
|                | <b>Delta</b>                      | 1,125,257  | 696,120      | 368,921      | 51,922       | 8,294      |
|                | <b>Other or unknown</b>           | 37,018     | 16139        | 14,300       | 2,231        | 4348       |
| <b>Outcome</b> | <b>Number of hospitalisations</b> | 22,575     | 5,239        | 10,618       | 4,184        | 2,534      |
|                | <b>Number of deaths</b>           | 6,336      | 83           | 930          | 1,209        | 2,195      |

**Table S6. Vaccine effectiveness against Alpha and Delta symptomatic disease, hospitalisation and death for BNT162b2, ChAdOx1-S and mRNA-1273 in England.** Table values are VE (95% CI) or VE (total cases, total controls when VE is 100%).

| Age       | Vaccine   | Dose*    | Symptomatic disease (tested by Sep 3 <sup>rd</sup> ) |                     | Hospitalisation (tested by Aug 13 <sup>th</sup> ) |                         | Death (tested by July 29 <sup>th</sup> ) |                          |
|-----------|-----------|----------|------------------------------------------------------|---------------------|---------------------------------------------------|-------------------------|------------------------------------------|--------------------------|
|           |           |          | Alpha                                                | Delta               | Alpha                                             | Delta                   | Alpha                                    | Delta                    |
| 16+       | BNT162b2  | 1        | 45.9 (44.2 to 47.6)                                  | 51.2 (50.7 to 51.7) | 85.8 (82.2 to 88.7)                               | 91.1 (89.7 to 92.3)     | 88.5 (78.5 to 93.8)                      | 88.6 (78.8 to 93.9)      |
|           |           | 2        | 94.9 (93.6 to 95.9)                                  | 83.3 (83.1 to 83.5) | 97.8 (91.2 to 99.5)                               | 96.6 (96.2 to 96.9)     | 95.6 (94.4 to 96.5)                      | 95.6 (94.4 to 96.6)      |
|           | ChAdOx1-S | 1        | 45.1 (43.4 to 46.7)                                  | 46.6 (45.8 to 47.5) | 84.0 (80.2 to 87.1)                               | 80.7 (78 to 83)         | 86.9 (77.5 to 92.4)                      | 86.9 (77.5 to 92.4)      |
|           |           | 2        | 82.1 (79.4 to 84.5)                                  | 64.2 (63.9 to 64.5) | 95.2 (86.8 to 98.2)                               | 92.5 (92 to 93)         | 93.2 (91.6 to 94.5)                      | 93.2 (91.7 to 94.5)      |
|           | mRNA-1273 | 1        | 58.1 (11.7 to 80.1)                                  | 64.9 (64 to 65.7)   |                                                   | 93.7 (89.9 to 96)       |                                          | 100 (0 cases, 21698 con) |
|           |           | 2        |                                                      | 93.6 (93.2 to 93.9) |                                                   |                         |                                          |                          |
|           | Any       | 1        | 45.5 (44.2 to 46.7)                                  | 52.2 (51.8 to 52.6) | 84.9 (82.3 to 87.2)                               | 87.6 (86.4 to 88.8)     | 76.7 (70.3 to 81.7)                      | 87.9 (81.6 to 92.1)      |
|           |           | 2        | 89.8 (88.5 to 90.9)                                  | 73.9 (73.6 to 74.1) | 96.6 (92.2 to 98.5)                               | 94.2 (93.8 to 94.5)     | 96.1 (89.0 to 98.6)                      | 94.3 (93.0 to 95.3)      |
|           | 16-39     | BNT162b2 | 1                                                    |                     | 52.5 (52.1 to 53.0)                               |                         | 90.7 (89 to 92.1)                        |                          |
|           |           |          | 2                                                    |                     | 88.8 (88.6 to 89.0)                               |                         | 99.2 (98.3 to 99.6)                      |                          |
| ChAdOx1-S |           | 1        |                                                      | 49.3 (45.7 to 52.7) |                                                   | 86.1 (66.5 to 94.2)     |                                          |                          |
|           |           | 2        |                                                      | 59.8 (56.1 to 63.3) |                                                   | 100 (no case, 1165 con) |                                          |                          |
| mRNA-1273 |           | 1        |                                                      | 66.2 (65.3 to 67.0) |                                                   | 93.9 (89.5 to 96.5)     |                                          |                          |
|           |           | 2        |                                                      | 93.5 (93.0 to 93.9) |                                                   |                         |                                          |                          |
| Any       |           | 1        |                                                      | 53.9 (53.5 to 54.4) |                                                   | 90.9 (89.4 to 92.3)     |                                          |                          |
|           |           | 2        |                                                      | 88.8 (88.6 to 89.0) |                                                   | 99.2 (98.5 to 99.6)     |                                          |                          |
| 40 to 64  | BNT162b2  | 1        | 49.4 (45.6 to 53)                                    | 43.9 (41.9 to 45.8) | 91.8 (83.3 to 96.0)                               | 93.0 (89.5 to 95.4)     |                                          |                          |
|           |           | 2        | 92 (86.7 to 95.2)                                    | 78.0 (77.5 to 78.5) | 81.5 (19.4 to 95.8)                               | 97.7 (97.3 to 98.1)     |                                          |                          |
|           | ChAdOx1-S | 1        | 49.9 (47.2 to 52.5)                                  | 33.4 (31.8 to 34.9) | 79.8 (71.2 to 85.8)                               | 83.2 (80.3 to 85.7)     |                                          |                          |
|           |           | 2        | 81.9 (76.2 to 86.2)                                  | 60.0 (59.4 to 60.7) | 82.4 (38.6 to 95.0)                               | 94.3 (93.8 to 94.8)     |                                          |                          |
|           | mRNA-1273 | 1        | 67.5 (12.7 to 87.9)                                  | 53.3 (49.9 to 56.5) |                                                   | 93.6 (82.9 to 97.6)     |                                          |                          |
|           |           | 2        |                                                      | 91.2 (90.4 to 91.8) |                                                   |                         |                                          |                          |
|           | Any       | 1        | 49.8 (47.4 to 52)                                    | 37.8 (36.5 to 39.1) | 84.1 (78.0 to 88.5)                               | 86.1 (83.8 to 88.0)     |                                          |                          |

|       |           |   |                     |                     |                     |                     |                     |                     |
|-------|-----------|---|---------------------|---------------------|---------------------|---------------------|---------------------|---------------------|
|       |           | 2 | 85.6 (81.6 to 88.7) | 63.5 (62.9 to 64.1) | 83.1 (53.4 to 93.9) | 95.2 (94.7 to 95.6) |                     |                     |
| 65+   | BNT162b2  | 1 | 54.8 (50.5 to 58.7) | 53.8 (43.8 to 62.0) | 79.2 (71.2 to 84.9) | 95.4 (85.4 to 98.6) | 80.4 (73.8 to 85.3) | 81.5 (55.5 to 92.3) |
|       |           |   |                     |                     | 100 (0 cases, 10139 |                     |                     |                     |
|       | ChAdOx1-S | 2 | 94.3 (90.5 to 96.6) | 64.6 (61.9 to 67.2) | con)                | 94.0 (92.7 to 95.0) | 96.6 (90.2 to 98.8) | 93.6 (91.2 to 95.4) |
|       |           | 1 | 54.8 (50.2 to 58.9) | 40.7 (31.4 to 48.8) | 79.8 (70.9 to 86.0) | 81.6 (69.0 to 89.0) | 82.9 (73.1 to 89.1) | 82.5 (57.9 to 92.7) |
|       |           |   |                     |                     |                     |                     | 100 (0 cases, 13030 |                     |
|       | Any       | 2 | 87.8 (81.8 to 91.8) | 47.2 (43.2 to 50.9) | 96.8 (72.4 to 99.6) | 87.7 (85.4 to 89.7) | con)                |                     |
|       |           | 1 | 54.9 (51.1 to 58.4) | 45.5 (38.1 to 52.0) | 79.8 (73.3 to 84.7) | 87.3 (79.4 to 92.1) | 81.3 (75.6 to 85.7) | 81.8 (65.2 to 90.5) |
|       |           | 2 | 91.1 (87.5 to 93.6) | 54.5 (51.1 to 57.7) | 98.5 (87.2 to 99.8) | 90.5 (88.8 to 92.0) | 97.2 (91.6 to 99)   | 92.1 (89.3 to 94.2) |
| 80+   |           |   |                     |                     |                     |                     |                     |                     |
| early | BNT162b2  | 1 | 56.0 (47.5 to 63.1) |                     | 76.1 (61.9 to 85.0) |                     |                     |                     |
|       |           | 2 | 81.3 (75.8 to 85.5) | 33.5 (16.8 to 46.8) | 92.1 (81.7 to 96.6) | 80.6 (69.8 to 87.6) |                     |                     |

\*dose 1: 28 days after first dose to time of second (if given), dose 2: 14 days after second dose

**Table S7. Number of cases and controls (cases; controls) contributing to vaccine effectiveness estimates as shown in Supplementary Table S4.**

| Age      | Vaccine      | Dose*       | Symptomatic disease (tested by Sep 3rd) |                | Hospitalisation (tested by Aug 13th) |              | Death (tested by July 29th) |             |
|----------|--------------|-------------|-----------------------------------------|----------------|--------------------------------------|--------------|-----------------------------|-------------|
|          |              |             | Alpha                                   | Delta          | Alpha                                | Delta        | Alpha                       | Delta       |
| 16+      | Unvaccinated | 0           | 493602; 2045645                         | 351725; 445531 | 11109; 2045645                       | 4062; 412352 | 2267; 2055868               | 195; 383872 |
|          | BNT162b2     | 1           | 5126; 69839                             | 131938; 199116 | 87; 69839                            | 211; 181926  | 72; 71347                   | 11; 167068  |
|          |              | 2           | 88; 54261                               | 104606; 492329 | 2; 54261                             | 717; 366948  | 4; 57238                    | 196; 278436 |
|          | ChAdOx1-S    | 1           | 5678; 123265                            | 33734; 114854  | 109; 123265                          | 282; 111679  | 31; 123265                  | 15; 109188  |
|          |              | 2           | 215; 64178                              | 353203; 677190 | 5; 64178                             | 2453; 541635 | 0; 64178                    | 314; 441596 |
|          | mRNA-1273    | 1           | 8; 1864                                 | 12896; 25243   | 0; 1864                              | 19; 23898    |                             | 0; 21698    |
|          |              | 2           |                                         | 1713; 21583    |                                      | 0; 12456     |                             |             |
|          | Any          | 1           | 10812; 194993                           | 178568; 339213 | 196; 194993                          | 512; 317503  | 103; 196501                 | 26; 297954  |
| 2        |              | 303; 118439 | 459249; 1190353                         | 7; 118439      | 3166; 920571                         | 4; 121416    | 510; 726472                 |             |
| 16-39    | Unvaccinated | 0           |                                         | 338947; 342028 |                                      | 2346; 301674 |                             |             |
|          | BNT162b2     | 1           |                                         | 122808; 173376 |                                      | 172; 156149  |                             |             |
|          |              | 2           |                                         | 17684; 163273  |                                      | 8; 97081     |                             |             |
|          | ChAdOx1-S    | 1           |                                         | 1507; 2337     |                                      | 5; 2059      |                             |             |
|          |              | 2           |                                         | 783; 1811      |                                      | 1; 1165      |                             |             |
|          | mRNA-1273    | 1           |                                         | 11390; 21711   |                                      | 14; 20469    |                             |             |
|          |              | 2           |                                         | 849; 14919     |                                      | 0; 8086      |                             |             |
|          | Any          | 1           |                                         | 135705; 197424 |                                      | 191; 178677  |                             |             |
| 2        |              |             | 19316; 179998                           |                | 9; 106331                            |              |                             |             |
| 40 to 64 | Unvaccinated | 0           | 66092; 309935                           | 46307; 58370   | 1830; 309935                         | 1535; 52852  |                             |             |
|          | BNT162b2     | 1           | 947; 15351                              | 7172; 16305    | 8; 15351                             | 28; 15281    |                             |             |
|          |              | 2           | 15; 11009                               | 25613; 90333   | 2; 11009                             | 135; 71763   |                             |             |
|          | ChAdOx1-S    | 1           | 2362; 63440                             | 23178; 72761   | 43; 63440                            | 197; 71162   |                             |             |
|          |              | 2           | 64; 27939                               | 217368; 391099 | 3; 27939                             | 1038; 306546 |                             |             |
|          | mRNA-1273    | 1           | 5; 1159                                 | 1323; 3097     | 0; 1159                              | 4; 3001      |                             |             |
|          |              | 2           |                                         | 790; 5868      |                                      | 0; 3795      |                             |             |



|              |              |           |               |                |              |              |             |            |
|--------------|--------------|-----------|---------------|----------------|--------------|--------------|-------------|------------|
|              | Any          | 1         | 3314; 79971   | 31673; 92163   | 51; 79971    | 229; 89444   |             |            |
|              |              | 2         | 79; 38948     | 243681; 487087 | 5; 38948     | 1172; 381992 |             |            |
| 65+          | Unvaccinated | 0         | 27963; 82268  | 1854; 2359     | 2815; 82268  | 219; 2098    | 1607; 92491 | 65; 1888   |
|              | BNT162b2     | 1         | 1103; 14328   | 196; 2063      | 62; 14328    | 3; 2012      | 70; 15836   | 6; 2042    |
|              |              | 2         | 19; 10139     | 17474; 48333   | 0; 10139     | 398; 41857   | 4; 13116    | 174; 39737 |
|              | ChAdOx1-S    | 1         | 1185; 18959   | 438; 5010      | 55; 18959    | 18; 4902     | 26; 18959   | 6; 4813    |
|              |              | 2         | 42; 13030     | 37425; 69149   | 2; 13030     | 985; 59827   | 0; 13030    | 218; 51046 |
|              | Any          | 1         | 2288; 33287   | 637; 7080      | 117; 33287   | 21; 6921     | 96; 34795   | 12; 6861   |
| 2            |              | 61; 23169 | 54818; 117324 | 2; 23169       | 1380; 101570 | 4; 26146     | 392; 90784  |            |
| 80+<br>early | Unvaccinated | 0         | 5509; 15888   | 207; 290       | 938; 15888   |              |             |            |
|              | BNT162b2     | 1         | 260; 1508     |                | 27; 1508     |              |             |            |
|              |              | 2         | 90; 2977      | 2550; 5304     | 6; 2977      | 149; 4717    |             |            |

\*dose 1: 28 days after first dose to time of second (if given), dose 2: 14 days after second dose

**Table S8. Logistic regression estimates for all age analysis for Delta cases, hospitalisations and deaths and Hosmer-Lemeshow goodness of fit assessment by deciles of predicted probability of being a case**

| Factor                                    | Level                              | Odds ratio<br>(symptomatic<br>infection) | Odds ratio<br>(hospitalisation) | Odds ratio<br>(death) |
|-------------------------------------------|------------------------------------|------------------------------------------|---------------------------------|-----------------------|
| health/social care<br>worker              | no                                 | base                                     | base                            | base                  |
|                                           | yes                                | 0.90 (0.89-0.91)                         | 0.88 (0.75-1.03)                | 0.48 (0.18-1.29)      |
| Care home resident                        | no                                 | base                                     | base                            | base                  |
|                                           | yes                                | 0.82 (0.75-0.90)                         | 1.04 (0.73-1.46)                | 1.99 (1.37-2.90)      |
| Nhs region                                | East of England                    | base                                     | base                            | base                  |
|                                           | London                             | 0.98 (0.97-0.99)                         | 1.19 (1.06-1.33)                | 0.66 (0.46-0.94)      |
|                                           | Midlands                           | 1.23 (1.22-1.24)                         | 2.10 (1.89-2.32)                | 1.27 (0.95-1.70)      |
|                                           | North East and<br>Yorkshire        | 1.39 (1.37-1.40)                         | 2.09 (1.89-2.32)                | 1.29 (0.96-1.72)      |
|                                           | North West                         | 1.43 (1.41-1.44)                         | 1.81 (1.62-2.01)                | 1.37 (1.02-1.84)      |
|                                           | South East                         | 0.95 (0.94-0.96)                         | 1.15 (1.03-1.29)                | 0.73 (0.52-1.02)      |
|                                           | South West                         | 0.93 (0.92-0.94)                         | 1.22 (1.08-1.37)                | 0.74 (0.52-1.06)      |
| clinically vulnerable                     | no                                 | base                                     | base                            | base                  |
|                                           | yes                                | 0.97 (0.95-0.98)                         | 2.57 (2.41-2.75)                | 5.13 (4.31-6.09)      |
| at risk                                   | no                                 | base                                     | base                            | base                  |
|                                           | yes                                | 0.95 (0.94-0.95)                         | 2.19 (2.06-2.32)                | 1.42 (1.10-1.82)      |
| index of multiple<br>deprivation quintile | 1                                  | base                                     | base                            | base                  |
|                                           | 2                                  | 0.98 (0.97-0.99)                         | 0.95 (0.89-1.01)                | 0.83 (0.67-1.03)      |
|                                           | 3                                  | 0.94 (0.93-0.95)                         | 0.85 (0.79-0.91)                | 0.65 (0.52-0.83)      |
|                                           | 4                                  | 0.92 (0.92-0.93)                         | 0.77 (0.72-0.83)                | 0.59 (0.46-0.75)      |
|                                           | 5                                  | 0.90 (0.89-0.90)                         | 0.68 (0.63-0.74)                | 0.59 (0.46-0.75)      |
| ethnicity                                 | African                            | 0.88 (0.86-0.90)                         | 1.16 (0.99-1.36)                | 0.53 (0.21-1.29)      |
|                                           | Another Asian<br>background        | 0.93 (0.90-0.95)                         | 1.25 (1.00-1.55)                | 1.35 (0.63-2.90)      |
|                                           | Another Black<br>background        | 0.94 (0.88-1.00)                         | 1.50 (1.06-2.15)                | 2.75 (1.06-7.15)      |
|                                           | Another ethnic<br>background       | 0.80 (0.77-0.82)                         | 1.59 (1.28-1.96)                | 0.53 (0.17-1.70)      |
|                                           | Arab                               | 0.78 (0.75-0.81)                         | 1.18 (0.89-1.57)                | 0.40 (0.09-1.72)      |
|                                           | Bangladeshi                        | 1.12 (1.08-1.15)                         | 1.95 (1.59-2.39)                | 1.18 (0.51-2.74)      |
|                                           | Caribbean                          | 1.11 (1.08-1.14)                         | 1.83 (1.58-2.11)                | 0.84 (0.46-1.55)      |
|                                           | Chinese                            | 0.61 (0.58-0.63)                         | 1.37 (0.98-1.91)                | 1.04 (0.26-4.26)      |
|                                           | Indian                             | 0.84 (0.83-0.85)                         | 1.23 (1.09-1.40)                | 0.94 (0.61-1.45)      |
|                                           | Mixed or multiple<br>ethnic groups | 0.94 (0.92-0.95)                         | 1.07 (0.91-1.26)                | 0.38 (0.12-1.19)      |
|                                           | Pakistani                          | 0.90 (0.88-0.92)                         | 1.43 (1.27-1.61)                | 1.18 (0.76-1.81)      |
|                                           | Prefer not to say                  | 0.78 (0.77-0.80)                         | 0.98 (0.87-1.10)                | 0.62 (0.41-0.94)      |
|                                           | White                              | base                                     | base                            | base                  |
|                                           | age (years)                        | 15-19                                    | 0.80 (0.78-0.82)                | 0.02 (0.02-0.03)      |

|                    |             |                  |                  |                           |
|--------------------|-------------|------------------|------------------|---------------------------|
|                    | 20-24       | 0.77 (0.75-0.78) | 0.04 (0.03-0.04) | 0.00 (0.00-0.01)          |
|                    | 25-29       | 0.64 (0.63-0.66) | 0.05 (0.05-0.06) | 0.01 (0.00-0.01)          |
|                    | 30-34       | 0.62 (0.60-0.63) | 0.07 (0.06-0.08) | 0.01 (0.00-0.01)          |
|                    | 35-39       | 0.69 (0.68-0.71) | 0.09 (0.08-0.11) | 0.02 (0.01-0.04)          |
|                    | 40-44       | 0.85 (0.83-0.87) | 0.12 (0.11-0.14) | 0.03 (0.02-0.05)          |
|                    | 45-49       | 0.92 (0.90-0.94) | 0.15 (0.13-0.17) | 0.06 (0.04-0.09)          |
|                    | 50-54       | 0.89 (0.88-0.91) | 0.18 (0.16-0.21) | 0.11 (0.07-0.16)          |
|                    | 55-59       | 0.86 (0.84-0.88) | 0.21 (0.19-0.24) | 0.16 (0.11-0.23)          |
|                    | 60-64       | 0.84 (0.82-0.86) | 0.27 (0.23-0.31) | 0.29 (0.20-0.41)          |
|                    | 65-69       | 0.89 (0.87-0.92) | 0.59 (0.52-0.68) | 0.62 (0.46-0.85)          |
|                    | 70-74       | base             | base             | base                      |
|                    | 75-79       | 1.13 (1.09-1.17) | 1.49 (1.29-1.72) | 1.74 (1.28-2.36)          |
|                    | 80-84       | 1.23 (1.17-1.29) | 1.77 (1.47-2.14) | 2.86 (2.09-3.91)          |
|                    | 85-89       | 1.05 (0.98-1.13) | 1.56 (1.22-1.99) | 4.18 (3.01-5.81)          |
|                    | >=90        | 0.76 (0.69-0.84) | 1.42 (1.03-1.95) | 4.84 (3.33-7.03)          |
| gender             | F           | base             | base             | base                      |
|                    | M           | 1.31 (1.30-1.31) | 1.49 (1.42-1.56) | 2.33 (2.00-2.72)          |
| week of onset      | 14          | 0.00 (0.00-0.00) | 0.01 (0.00-0.03) | 1.41 (1.02-1.97)*         |
|                    | 15          | 0.00 (0.00-0.00) | 0.00 (0.00-0.01) | 0.50 (0.22-1.15)*         |
|                    | 16          | 0.00 (0.00-0.01) | 0.01 (0.01-0.03) | 2.49 (0.78-7.92)*         |
|                    | 17          | 0.01 (0.01-0.01) | 0.02 (0.01-0.03) | * cubic spline parameters |
|                    | 18          | 0.02 (0.02-0.02) | 0.01 (0.01-0.03) |                           |
|                    | 19          | 0.03 (0.03-0.03) | 0.05 (0.03-0.07) |                           |
|                    | 20          | 0.06 (0.05-0.06) | 0.10 (0.07-0.13) |                           |
|                    | 21          | 0.15 (0.15-0.16) | 0.24 (0.19-0.29) |                           |
|                    | 22          | 0.27 (0.27-0.28) | 0.38 (0.32-0.45) |                           |
|                    | 23          | 0.35 (0.34-0.35) | 0.43 (0.36-0.51) |                           |
|                    | 24          | 0.38 (0.37-0.39) | 0.41 (0.35-0.49) |                           |
|                    | 25          | 0.54 (0.53-0.54) | 0.54 (0.47-0.63) |                           |
|                    | 26          | 0.68 (0.67-0.69) | 0.73 (0.64-0.82) |                           |
|                    | 27          | 0.92 (0.91-0.93) | 0.89 (0.79-1.00) |                           |
|                    | 28          | 1.24 (1.22-1.25) | 1.20 (1.07-1.34) |                           |
|                    | 29          | base             | base             |                           |
|                    | 30          | 1.11 (1.09-1.13) | 1.07 (0.94-1.22) |                           |
|                    | 31          | 1.29 (1.27-1.30) | 1.30 (1.15-1.47) |                           |
|                    | 32          | 1.40 (1.37-1.42) | 1.23 (1.08-1.39) |                           |
|                    | 33          | 1.43 (1.41-1.45) | 1.46 (1.30-1.65) |                           |
|                    | 34          | 1.27 (1.26-1.29) | 1.54 (1.37-1.74) |                           |
|                    | 35          | 1.03 (1.01-1.04) | 1.19 (1.06-1.35) |                           |
|                    | 36          | 0.75 (0.74-0.76) | 0.81 (0.71-0.92) |                           |
|                    | 37          | 0.58 (0.57-0.59) | 0.62 (0.52-0.75) |                           |
|                    | 38          | 0.60 (0.59-0.61) |                  |                           |
|                    | 39          | 0.64 (0.63-0.65) |                  |                           |
| vaccination status | unvacc      | base             | base             | base                      |
|                    | AZ_d1:0-3   | 0.68 (0.55-0.84) | 0.53 (0.16-1.69) | 0 deaths                  |
|                    | AZ_d1:4-13  | 0.78 (0.70-0.86) | 0.65 (0.35-1.18) | 1.06 (0.15-7.71)          |
|                    | AZ_d1:14-27 | 0.50 (0.46-0.53) | 0.16 (0.08-0.30) | 0 deaths                  |

|                                    |                                                       |                                     |                                        |                                        |
|------------------------------------|-------------------------------------------------------|-------------------------------------|----------------------------------------|----------------------------------------|
|                                    | AZ_d1:28+                                             | 0.53 (0.53-0.54)                    | 0.19 (0.17-0.22)                       | 0.13 (0.08-0.22)                       |
|                                    | AZ_d2:0-7                                             | 0.51 (0.49-0.52)                    | 0.17 (0.13-0.23)                       | 0.21 (0.08-0.59)                       |
|                                    | AZ_d2:7-13                                            | 0.35 (0.34-0.36)                    | 0.07 (0.05-0.10)                       | 0 deaths                               |
|                                    | AZ_d2:14+                                             | 0.36 (0.35-0.36)                    | 0.07 (0.07-0.08)                       | 0.07 (0.05-0.08)                       |
|                                    | PF_d1:0-3                                             | 1.20 (1.16-1.23)                    | 0.94 (0.74-1.21)                       | 0 deaths                               |
|                                    | PF_d1:4-13                                            | 0.88 (0.86-0.89)                    | 0.47 (0.39-0.56)                       | 0.51 (0.16-1.62)                       |
|                                    | PF_d1:14-27                                           | 0.40 (0.40-0.41)                    | 0.09 (0.07-0.12)                       | 0 deaths                               |
|                                    | PF_d1:28+                                             | 0.49 (0.48-0.49)                    | 0.09 (0.08-0.10)                       | 0.11 (0.06-0.21)                       |
|                                    | PF_d2:0-6                                             | 0.38 (0.37-0.39)                    | 0.06 (0.04-0.10)                       | 0.11 (0.01-0.76)                       |
|                                    | PF_d2:7-13                                            | 0.07 (0.07-0.08)                    | 0.01 (0.00-0.02)                       | 0 deaths                               |
|                                    | PF_d2:14+                                             | 0.17 (0.17-0.17)                    | 0.03 (0.03-0.04)                       | 0.04 (0.03-0.06)                       |
|                                    | MD_d1:0-3                                             | 1.15 (1.07-1.24)                    | 0.60 (0.27-1.34)                       | 0 deaths                               |
|                                    | MD_d1:4-13                                            | 0.81 (0.78-0.85)                    | 0.36 (0.21-0.62)                       | 1.27 (0.17-9.27)                       |
|                                    | MD_d1:14-27                                           | 0.21 (0.20-0.22)                    | 0.08 (0.04-0.19)                       | 0 deaths                               |
|                                    | MD_d1:28+                                             | 0.35 (0.34-0.36)                    | 0.06 (0.04-0.10)                       | 0 deaths                               |
|                                    | MD_d2:0-6                                             | 0.23 (0.21-0.24)                    | 0.02 (0.00-0.12)                       | 0 deaths                               |
|                                    | MD_d2:7-13                                            | 0.04 (0.04-0.05)                    | 0.02 (0.00-0.15)                       | 0 deaths                               |
|                                    | MD_d2:14+                                             | 0.06 (0.06-0.07)                    |                                        |                                        |
| Hosmer-Lemeshow<br>goodness of fit | Decile of predicted<br>probability of being<br>a case | Observed/ Expected<br>cases (ratio) | Observed/<br>Expected cases<br>(ratio) | Observed/<br>Expected cases<br>(ratio) |
|                                    | 1                                                     | 8939/9563 (0.93)                    | 14/13 (1.10)                           | 0/0.2 (0.00)                           |
|                                    | 2                                                     | 38320/40382 (0.95)                  | 45/45 (0.99)                           | 1/0.7 (1.43)                           |
|                                    | 3                                                     | 62328/62455 (1.00)                  | 79/85 (0.93)                           | 1/1.4 (0.71)                           |
|                                    | 4                                                     | 81171/80704 (1.01)                  | 107/134 (0.80)                         | 2/2.6 (0.77)                           |
|                                    | 5                                                     | 98467/97534 (1.01)                  | 172/201 (0.86)                         | 3/4.5 (0.67)                           |
|                                    | 6                                                     | 116152/114096<br>(1.02)             | 260/296 (0.88)                         | 7/7.9 (0.89)                           |
|                                    | 7                                                     | 131738/129963<br>(1.01)             | 363/437 (0.83)                         | 9/13.9 (0.65)                          |
|                                    | 8                                                     | 148032/147332<br>(1.00)             | 621/673 (0.92)                         | 12/26.2 (0.46)                         |
|                                    | 9                                                     | 169338/170144<br>(1.00)             | 1220/1199 (1.02)                       | 49/59.3 (0.83)                         |
|                                    | 10                                                    | 206482/208794<br>(0.99)             | 4697/4495 (1.05)                       | 660/627.4 (1.05)                       |

**Table S9. Number of cases and controls (cases; controls) contributing to vaccine effectiveness estimates against symptomatic disease as shown in Table 1 and Supplementary Table S10 (mRNA-1273 VE).**

|              |           | Weeks post Dose 2  |                    |                    |                   |                                    |               |
|--------------|-----------|--------------------|--------------------|--------------------|-------------------|------------------------------------|---------------|
| Vaccine      | Age group | 1 week             | 2-9 weeks          | 10-14 weeks        | 15-19 weeks       | 20+ weeks<br>(20-24 weeks for 65+) | 25+ weeks     |
| Unvaccinated | 16+       | 351725 ;<br>445531 |                    |                    |                   |                                    |               |
|              | 65+       | 1854 ; 2359        |                    |                    |                   |                                    |               |
|              | 40-64     | 46307 ; 58370      |                    |                    |                   |                                    |               |
|              | 16-39     | 338947 ;<br>342028 |                    |                    |                   |                                    |               |
| ChAdOx1-S    | 16+       | 8072 ; 25045       | 127291 ;<br>284404 | 122368 ;<br>201901 | 80178 ;<br>144961 | 23366 ; 45924                      |               |
|              | 65+       | 39 ; 1511          | 3090 ; 18879       | 9762 ; 18768       | 19282             | 8383 ; 11589                       | 453 ; 631     |
|              | 40-64     | 6194 ; 16409       | 89337 ;<br>180719  | 79973 ;<br>120590  | 42824 ;<br>78396  | 5234 ; 11394                       |               |
|              | 16-39     | 130 ; 195          | 659 ; 1512         | 122 ; 296          |                   |                                    |               |
| BNT162b2     | 16+       | 3317 ; 33997       | 24519 ;<br>233114  | 22901 ; 92724      | 31498 ;<br>85083  | 25688 ; 81408                      |               |
|              | 65+       | 13 ; 913           | 620 ; 10840        | 3381 ; 12292       | 6780 ; 13058      | 5996 ; 10753                       | 697 ;<br>1390 |
|              | 40-64     | 275 ; 2923         | 5461 ; 34319       | 7837 ; 23239       | 9495 ; 24132      | 2820 ; 8643                        |               |
|              | 16-39     | 2924 ; 27535       | 15488 ;<br>150027  | 2174 ; 13115       | 22 ; 131          |                                    |               |
| mRNA-1273    | 16+       | 238 ; 3665         | 1377 ; 19020       | 330 ; 2540         |                   |                                    |               |
|              | 40-64     | 60 ; 599           | 513 ; 3935         | 274 ; 1922         |                   |                                    |               |
|              | 16-39     | 172 ; 2986         | 809 ; 14510        | 40 ; 409           |                   |                                    |               |

**Table S10. Vaccine effectiveness against Delta symptomatic disease and hospitalisation for mRNA-1273 in England.** Table values are VE (95% CI) or VE (total cases, total controls when VE is 100%).

| Weeks post Dose 2   |           |                     |                         |                     |
|---------------------|-----------|---------------------|-------------------------|---------------------|
| Outcome             | Age group | 1 week              | 2-9 weeks               | 10-14 weeks         |
| Symptomatic Disease | 16+       | 95.6 (95.0 to 96.2) | 93.8 (93.4 to 94.1)     | 85.6 (83.8 to 87.2) |
|                     | 40-64     | 93.5 (91.5 to 95.1) | 92.1 (91.3 to 92.8)     | 87.3 (85.5 to 88.8) |
|                     | 16-39     | 95.7 (94.9 to 96.3) | 93.5 (93.0 to 94.0)     | 82.1 (75.2 to 87.1) |
| Hospitalisation     | 16+       | 97.9 (84.9 to 99.7) | 100 (0 case, 12035 con) |                     |

**Table S11. Vaccine effectiveness against Alpha symptomatic disease among individuals with two doses of ChAdOx1-S, BNT162b2 in England at 1 week, 2-9 weeks and 10+ weeks.** Table values are VE (95% CI) or VE (total cases, total controls when VE is 100%).

| Weeks post Dose 2 |           |                     |                     |                     |
|-------------------|-----------|---------------------|---------------------|---------------------|
| Vaccine           | Age group | 1 week              | 2-9 weeks           | 10+                 |
| ChAdOx1-S         | 16+       | 71.8 (66.2 to 76.5) | 82.4 (79.6 to 84.7) | 76.2 (49.8 to 88.7) |
|                   | 65+       | 78.9 (67.0 to 86.5) | 88.2 (82.2 to 92.1) |                     |
|                   | 40-64     | 73.0 (63.6 to 80.0) | 81.7 (76.0 to 86.1) |                     |
| BNT162b2          | 16+       | 90.2 (86.9 to 92.7) | 94.9 (93.6 to 95.9) | 94.8 (88.4 to 97.7) |
|                   | 80+       | 78.3 (67.4 to 85.6) | 81.7 (76.1 to 86.0) | 67.1 (31.1 to 84.3) |
|                   | 65+       | 86.3 (76.4 to 92.1) | 94.2 (90.3 to 96.6) |                     |
|                   | 40-64     | 94.7 (85.8 to 98.0) | 91.9 (86.5 to 95.2) |                     |

**Table S12. Vaccine effectiveness against Alpha hospitalisation among individuals with two doses of ChAdOx1-S, BNT162b2 in England at 1 week, 2-9 weeks and 10+ weeks.** Table values are VE (95% CI) or VE (total cases, total controls when VE is 100%).

| Vaccine   | Age group | Weeks post Dose 2       |                         |                        |
|-----------|-----------|-------------------------|-------------------------|------------------------|
|           |           | 1 week                  | 2-9 weeks               | 10+ weeks              |
| ChAdOx1-S | 16+       | 89.6 (67.4 to 96.7)     | 95.1 (86.7 to 98.2)     |                        |
|           | 65+       | 89.7 (19.2 to 98.7)     | 96.8 (71.8 to 99.6)     | 100 (0 cases, 874 con) |
|           | 40-64     | 88.2 (12.8 to 98.4)     | 83.0 (40.5 to 95.2)     | 100 (0 cases, 282 con) |
| BNT162b2  | 16+       | 96.4 (74.2 to 99.5)     | 97.7 (90.8 to 99.4)     |                        |
|           | 80+       | 86.6 (57.4 to 95.8)     | 92.6 (81.6 to 97.0)     | 87.8 (-15.4 to 98.7)   |
|           | 65+       | 89.2 (17.1 to 98.6)     | 100 (0 cases, 8639 con) |                        |
|           | 40-64     | 100 (0 cases, 1556 con) | 82.1 (21.6 to 95.9)     | 100 (0 cases, 267 con) |

**Table S13. Vaccine effectiveness against Alpha deaths among individuals with two doses of BNT162b2 or all vaccines in England at 2+ weeks.** Table values are VE (95% CI).

| Vaccine  | Age group | Weeks post Dose 2   |
|----------|-----------|---------------------|
|          |           | 2 weeks +           |
| BNT162b2 | 16+       | 95.6 (94.4 to 96.5) |
|          | 65+       | 96.6 (90.2 to 98.8) |
| Any      | 16+       | 96.1 (89.0 to 98.6) |
|          | 65+       | 97.2 (91.6 to 99.0) |

**Table S14. Number of cases and controls (cases; controls) contributing to vaccine effectiveness estimates against hospitalisation as shown in Table 2 and Supplementary Table S10.**

|                    |           |                | Weeks post Dose 2 |              |              |             |             |
|--------------------|-----------|----------------|-------------------|--------------|--------------|-------------|-------------|
| Vaccine            | Age group | Subgroup       | 1 week            | 2-9 weeks    | 10-14 weeks  | 15-19 weeks | 20+ weeks   |
| Unvaccinated       | 16+       |                | 4062 ; 412352     |              |              |             |             |
|                    | 65+       | All            | 219 ; 2098        |              |              |             |             |
|                    |           | CEV            | 46 ; 387          |              |              |             |             |
|                    |           | Not CEV        | 173 ; 1711        |              |              |             |             |
|                    | 40-64     | All            | 1535 ; 52852      |              |              |             |             |
| Risk/CEV group     |           | 592 ; 10130    |                   |              |              |             |             |
| Not risk/CEV group |           | 943 ; 42722    |                   |              |              |             |             |
| 16-39              | All       | 2346 ; 301674  |                   |              |              |             |             |
| ChAdOx1-S          | 16+       |                | 31 ; 24975        | 520 ; 278747 | 828 ; 166684 | 821 ; 79004 | 284 ; 17200 |
|                    | 65+       | All            | 2 ; 1511          | 80 ; 18858   | 262 ; 18689  | 458 ; 17357 | 185 ; 4923  |
|                    |           | CEV            | 1 ; 290           | 34 ; 3198    | 106 ; 3343   | 183 ; 3054  | 93 ; 1202   |
|                    |           | Not CEV        | 1 ; 1221          | 46 ; 15660   | 156 ; 15346  | 275 ; 14303 | 92 ; 3721   |
|                    | 40-64     | All            | 24 ; 16360        | 335 ; 176252 | 422 ; 94055  | 243 ; 33792 | 38 ; 2447   |
|                    |           | Risk/CEV group | 5 ; 2912          | 186 ; 41173  | 273 ; 27624  | 198 ; 15648 | 30 ; 1552   |
| Not risk/CEV group |           |                |                   |              |              |             |             |
| BNT162b2           | 16+       |                | 2 ; 30880         | 53 ; 174697  | 174 ; 78290  | 295 ; 72026 | 195 ; 41935 |
|                    | 65+       | All            | 0 ; 912           | 9 ; 10819    | 75 ; 12273   | 173 ; 12437 | 141 ; 6328  |
|                    |           | CEV            | 0 ; 173           | 3 ; 2133     | 40 ; 2439    | 92 ; 2533   | 83 ; 1432   |
|                    |           | Not CEV        | 0 ; 739           | 6 ; 8686     | 35 ; 9834    | 81 ; 9904   | 58 ; 4896   |
|                    | 40-64     | All            | 0 ; 2798          | 25 ; 31682   | 49 ; 21018   | 53 ; 16954  | 8 ; 2109    |
|                    |           | Risk/CEV group | 0 ; 1113          | 21 ; 17143   | 46 ; 13637   | 46 ; 11222  | 6 ; 1122    |
| Not risk/CEV group |           | 0 ; 1685       | 4 ; 14539         | 3 ; 7381     | 7 ; 5732     | 2 ; 987     |             |
| 16-39              | All       | 2 ; 24541      | 8 ; 94496         | 0 ; 2584     |              |             |             |



|           |     |     |          |           |
|-----------|-----|-----|----------|-----------|
| MRNA-1273 | 16+ | All | 1 ; 3171 | 0 ; 12035 |
|-----------|-----|-----|----------|-----------|

**Table S15. Number of cases and controls (cases; controls) contributing to vaccine effectiveness estimates against death as shown in Table 3.**

|           |           | Weeks post Dose 2 |              |             |            |
|-----------|-----------|-------------------|--------------|-------------|------------|
| Vaccine   | Age group | 2-9 weeks         | 10-14 weeks  | 15-19 weeks | 20+ weeks  |
| Unvacc    | 16+       | 195 ; 383872      |              |             |            |
|           | 65+       | 65 ; 1888         |              |             |            |
| ChAdOx1-S | 16+       | 56 ; 269333       | 100 ; 126863 | 126 ; 40484 | 33 ; 5072  |
|           | 65+       | 18 ; 18827        | 60 ; 18461   | 110 ; 12511 | 31 ; 1298  |
| BNT162b2  | 16+       | 6 ; 127669        | 42 ; 74176   | 74 ; 56497  | 75 ; 20223 |
|           | 65+       | 4 ; 11154         | 31 ; 12707   | 66 ; 11175  | 74 ; 4730  |

**Table S16. Vaccine effectiveness against Delta hospitalisation, using only admissions coded as respiratory admission for ChAdOx1-S and BNT162b2 in England.** Table values are VE (95% CI) or VE (total cases, total controls when VE is 100%).

|           |           | Weeks post Dose 2         |                     |                     |                     |                     |
|-----------|-----------|---------------------------|---------------------|---------------------|---------------------|---------------------|
| Vaccine   | Age group | 1 week                    | 2-9 weeks           | 10-14 weeks         | 15-19 weeks         | 20+ weeks           |
| ChAdOx1-S | 16+       | 94.9 (91.9 to 96.7)       | 96.0 (95.4 to 96.4) | 93.4 (92.6 to 94.0) | 88.5 (87.0 to 89.7) | 82.6 (79.1 to 85.4) |
|           | 65+       | 88.0 (9.8 to 98.4)        | 91.8 (88.2 to 94.2) | 90.8 (88.2 to 92.9) | 86.8 (83.4 to 89.5) | 83.2 (77.4 to 87.5) |
| BNT162b2  | 16+       | 100 (0 cases, 30880 cont) | 99.2 (98.8 to 99.5) | 97.7 (97.1 to 98.1) | 95.5 (94.7 to 96.2) | 93.5 (91.9 to 94.7) |
|           | 65+       | 98.3 (95.8 to 99.3)       | 96.9 (95.5 to 97.9) | 93.4 (91.4 to 94.9) | 91.6 (88.5 to 93.8) |                     |

**Table S17. Vaccine effectiveness against Delta hospitalisation among individuals with two doses of ChAdOx1-S and BNT162b2 mRNA-1273 in England at 1 week, 2-9 weeks, 10 -14 weeks, 15-19 weeks and 20+ weeks, using test negative hospitalised controls. Table values are VE (95% CI).**

|           |           | Weeks post Dose 2   |                     |                     |                     |                     |
|-----------|-----------|---------------------|---------------------|---------------------|---------------------|---------------------|
| Vaccine   | Age group | 1 week              | 2-9 weeks           | 10-14 weeks         | 15-19 weeks         | 20+ weeks           |
| ChAdOx1-S | 16+       | 91.5 (86.2 to 94.8) | 93.5 (92.3 to 94.5) | 90.2 (88.5 to 91.8) | 83.7 (80.2 to 86.7) | 77.2 (69.6 to 82.9) |
| BNT162b2  | 16+       | 99.1 (96.4 to 99.8) | 98.3 (97.7 to 98.8) | 96 (94.9 to 96.8)   | 93.5 (91.8 to 94.8) | 88.1 (84.2 to 91.1) |

**Table S18. Vaccine effectiveness against Delta symptomatic infection stratified by risk group for ChAdOx1-S and BNT162b2. Table values are VE (95% CI).**

|           |           |                    | Weeks post Dose 2   |                     |                     |                     |
|-----------|-----------|--------------------|---------------------|---------------------|---------------------|---------------------|
| Vaccine   | Age group | Subgroup           | 2-9 weeks           | 10-14 weeks         | 15-19 weeks         | 20+ weeks           |
| ChAdOx1-S | 65+       | CEV                | 53.7 (42.2 to 62.9) | 43 (30.9 to 53)     | 37.4 (24.4 to 48.2) | 32 (17 to 44.3)     |
|           |           | Not CEV            | 60.1 (56 to 63.8)   | 51.5 (47.2 to 55.4) | 45 (40.3 to 49.4)   | 38.9 (33.1 to 44.1) |
|           | 40-64     | Risk/CEV group     | 60.7 (59.1 to 62.2) | 55.1 (53.4 to 56.8) | 50.9 (48.8 to 52.9) | 50.2 (47.1 to 53)   |
|           |           | Not risk/CEV group | 62.3 (61.6 to 63.1) | 58 (57 to 58.9)     | 56.8 (55.6 to 57.9) | 60.9 (58.5 to 63.1) |
| BNT162b2  | 65+       | CEV                | 72.3 (63.3 to 79)   | 59.6 (50.5 to 67)   | 56.2 (46.9 to 63.9) | 44.4 (32.1 to 54.4) |
|           |           | Not CEV            | 80.8 (78.1 to 83.1) | 71.2 (68.4 to 73.7) | 64.5 (61.3 to 67.4) | 56.9 (52.8 to 60.6) |
|           | 40-64     | Risk/CEV group     | 82.1 (81.1 to 83.1) | 75.8 (74.6 to 77)   | 69.3 (67.8 to 70.7) | 64.9 (62.4 to 67.3) |
|           |           | Not risk/CEV group | 85.4 (84.8 to 86)   | 77.9 (76.9 to 78.9) | 74.3 (73 to 75.5)   | 71.6 (69.5 to 73.5) |

**Table S19. Number of cases and controls (cases; controls) contributing to vaccine effectiveness estimates against Delta symptomatic infection as shown in Supplementary Table S17.**

| Weeks post Dose 2 |           |                    |              |             |             |           |
|-------------------|-----------|--------------------|--------------|-------------|-------------|-----------|
| Vaccine           | Age group | Subgroup           | 2-9 weeks    | 10-14 weeks | 15-19 weeks | 20+ weeks |
| Unvacc            | 65+       | CEV                | 268;428      |             |             |           |
|                   |           | Not CEV            | 1586;1931    |             |             |           |
|                   | 40-64     | Risk/CEV group     | 9208;11352   |             |             |           |
|                   |           | Not risk/CEV group | 37099;47018  |             |             |           |
| ChAdOx1-S         | 65+       | CEV                | 432;3201     | 1472;3352   | 2338;3262   | 1616;2588 |
|                   |           | Not CEV            | 2658;15678   | 8290;15416  | 13399;16020 | 7220;9632 |
|                   | 40-64     | Risk/CEV group     | 15539;41434  | 19263;29543 | 15986;27770 | 3220;6896 |
|                   |           | Not risk/CEV group | 73798;139285 | 60710;91047 | 26838;50626 | 2014;4498 |
| BNT162b2          | 65+       | CEV                | 116;2139     | 661;2444    | 1236;2613   | 1392;2538 |
|                   |           | Not CEV            | 504;8701     | 2720;9848   | 5544;10445  | 5301;9605 |
|                   | 40-64     | Risk/CEV group     | 2461;17356   | 4833;13803  | 6394;16090  | 1659;4955 |
|                   |           | Not risk/CEV group | 3000;16963   | 3004;9436   | 3101;8042   | 1161;3688 |

**Figure S1.** Total numbers of cases and controls by week.

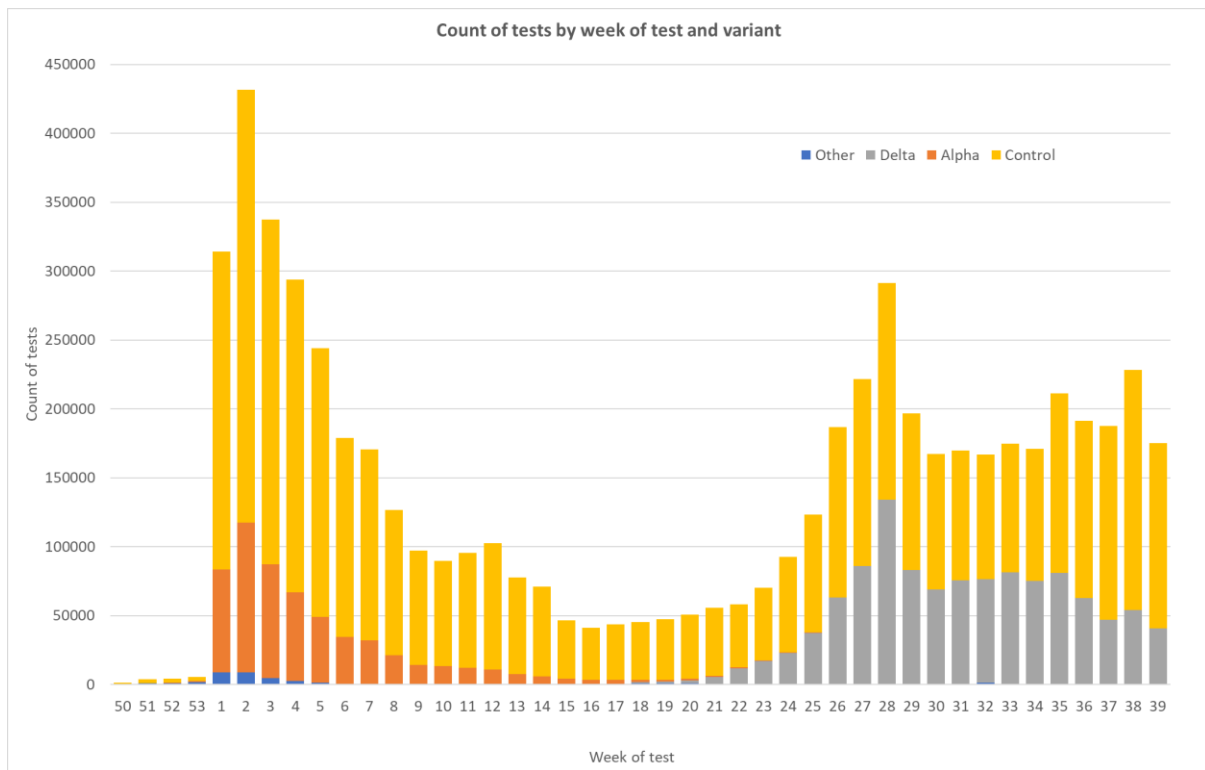

**Figure S2.** Vaccine effectiveness against hospitalization age  $\geq 65$ , all vaccines combined for intervals after the second dose with 95% confidence intervals.

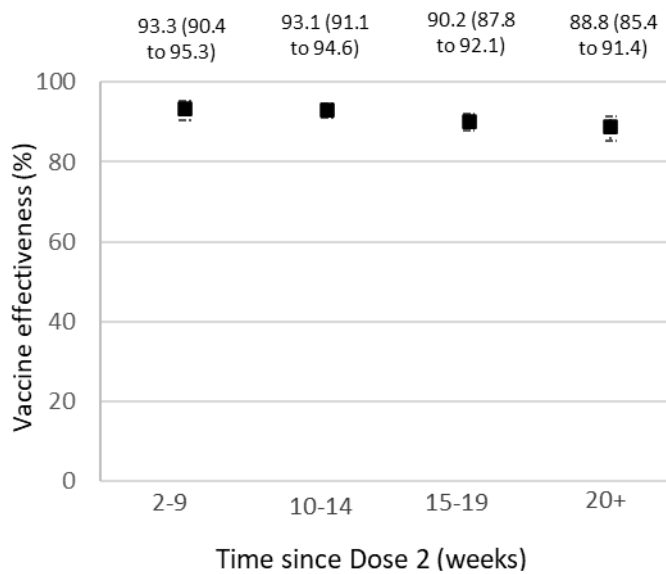

**Figure S3.** Vaccine effectiveness against Delta hospitalisation using test negative hospitalised controls, with 95% confidence intervals\*.

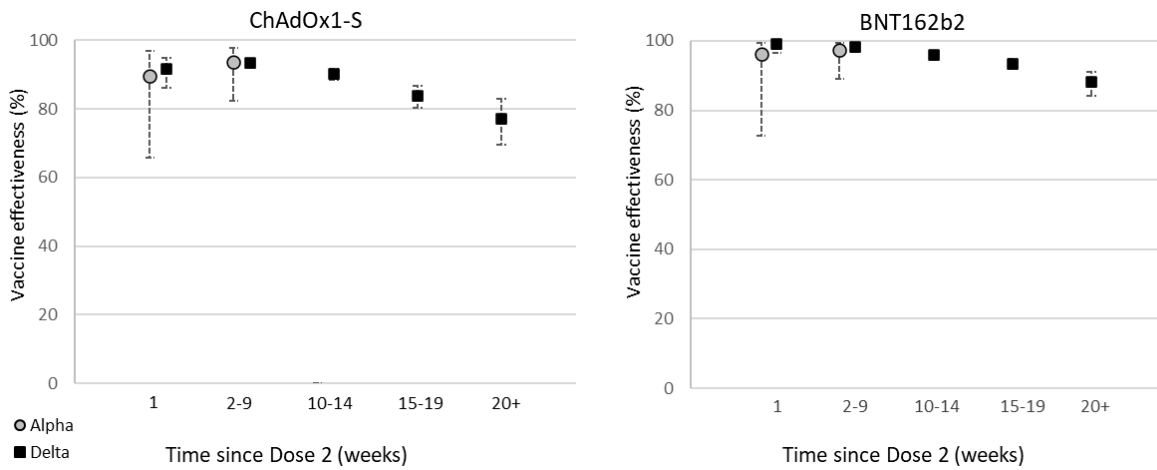

**Figure S4.** Vaccine effectiveness against Delta hospitalisation (age 40-64 years) by clinical risk group status, with 95% confidence intervals\*.

**a) In a clinical risk group**

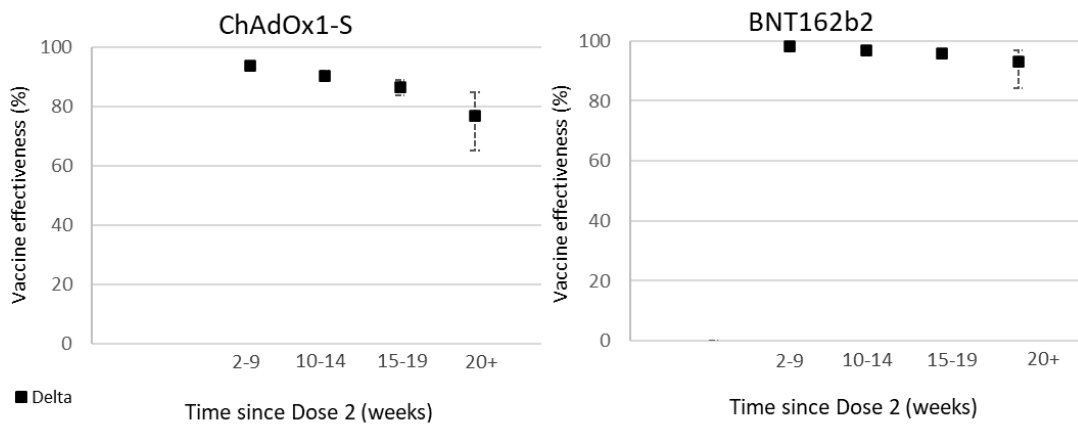

**b) Not in a clinical risk group**

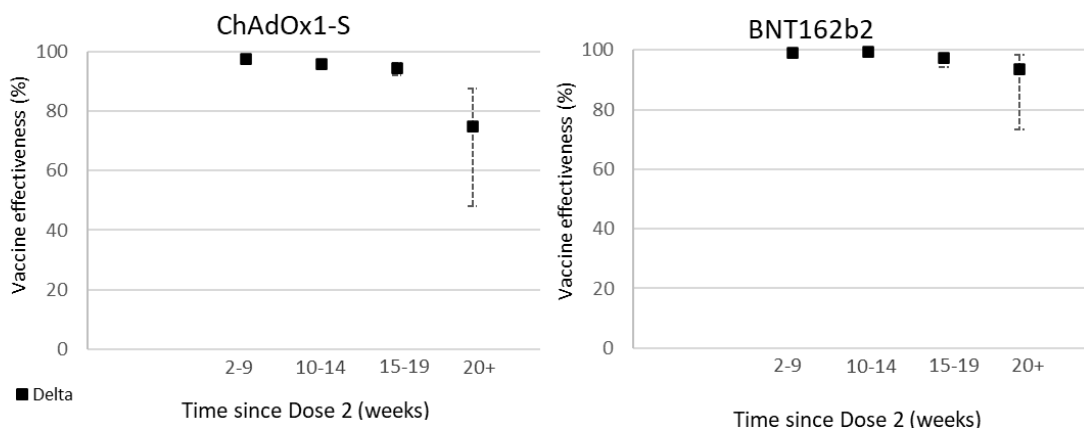

\* Individuals with an underlying risk group (Risk) include a broad range of chronic conditions as described in The Green Book. <sup>6</sup>

**Figure S5.** Vaccine effectiveness of BNT162b2 against symptomatic disease (Delta variant) in people aged 80+ with either a short ( $\leq 4$  weeks) or long ( $\geq 8$  weeks) interval between first and second doses, with 95% confidence intervals.

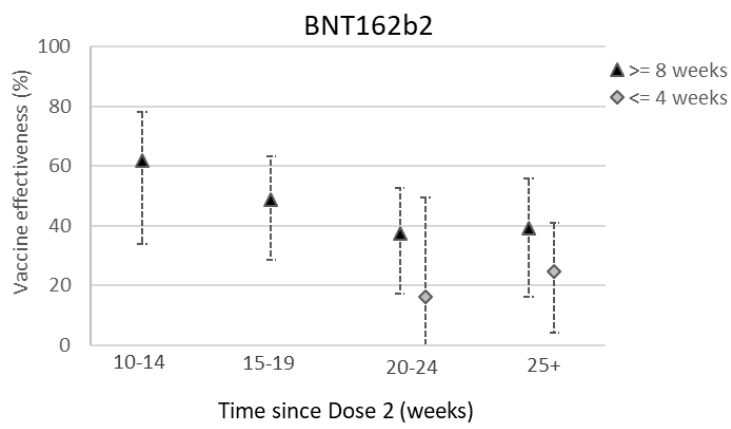

## Supplementary Section 3: Limitations

### Main potential sources of bias

#### i) Sensitivity and specificity of the outcome

Although specificity within symptomatic individuals should be very high for PCR, lack of sensitivity will lead to underestimation of vaccine effectiveness due to outcome misclassification. This is why we restricted samples to those tested within 10 days of onset and did not include negative samples if taken shortly before a positive test. However, the increased use of lateral flow testing devices, with PCR sampling accessed if the lateral flow tests positive is likely to mean an increasing chance of false negative PCR tests and potentially an increasing underestimation of vaccine effectiveness.

#### ii) Residual confounding

Residual confounding and the possibility this may differ by vaccine and interval after vaccination could be important. Although the test negative design used in symptomatic individuals can help ensure cases and controls are similar in terms of exposure and health care seeking there may remain factors that are all controls associated with both testing behaviour and vaccination. In particular for the outcomes of hospitalization and death our design relies on using and adjusting for factors that may be associated with severe COVID such as age and being clinically extremely vulnerable, but the CEV and risk information is imperfect and there may be factors remaining associated with severe outcomes and vaccination. Failure to adjust for a factor that gave an increased chance of vaccination and the outcome would lead to underestimation of VE. For example, BNT162b2 was less likely to be used in care homes and among individuals in clinical risk groups, in particular housebound individuals, due to challenges in ultra-low temperature storage and delivery. Instead, ChAdOx1-S was more likely to be given to these groups but this vaccine was not given to healthy adults under 40 years of age following a recommendation to use alternative vaccines in this age-group because of the risk of vaccine-induced thrombotic thrombocytopenia.<sup>6</sup> This might mean underestimation of VE for ChAdOx1-S is more likely, and if the use in risk groups was in the early part of the roll out this may also mean residual confounding is greater for the longer intervals after vaccination.

#### iii) Prior infection,

Over time there will be an increasing number of individuals who would have been infected both prior to and after vaccination. Where they have previously tested positive they will be excluded from the analysis, but many will remain unknown. This means that an increasing proportion of the unvaccinated control group may have some level of protection from natural infection. This will attenuate vaccine effectiveness over time and could lead to overestimation of waning. This impact will be greater where vaccine effectiveness is lower (whether this is related to vaccine type, variant or waning). This will also vary by age as seroprevalence data suggests that there are higher rates of natural infection in younger adults.

#### iv) selection bias related to use of self-administered lateral flow devices and self-declaration of symptoms.

Selection bias may be an issue if accessing testing is influenced by both vaccination status and knowledge of likely COVID-19 infection status. For example, suppose a vaccinated and unvaccinated person with mild symptoms sought a PCR test with equal probability, but the vaccinated person was more likely to seek a test than the unvaccinated person if they were confident it was COVID-19 (e.g.

because they had done a lateral flow test) then this would bias VE downwards. Similarly, differential use of lateral flow tests prior to PCR in vaccinated and unvaccinated individuals may cause bias, for example if vaccinated individuals stop using lateral flow devices then VE may be overestimated. We also rely on the self-declaration of symptoms when the test is requested and it is likely that some individuals who are not symptomatic declare symptoms in order to access a test. This will attenuate effectiveness if it is lower against asymptomatic infection and, for test-negative controls, may mean they are not matched on exposure to an infectious disease which is one of the strengths of the TNCC design.



#### Supplementary Section 4: References

1. Public Health England. SARS-CoV-2 variants of concern and variants under investigation in England Technical briefing 23. 2021.
2. Lopez Bernal J, Andrews N, Gower C, et al. Effectiveness of Covid-19 Vaccines against the B.1.617.2 (Delta) Variant. NEJM 2021;385:585-94.
3. Weekly bulletins for 2021. 2021. (Accessed 13/09/2021, at [https://www.gov.uk/government/publications/emergency-department-weekly-bulletins-for-2021.](https://www.gov.uk/government/publications/emergency-department-weekly-bulletins-for-2021))
4. COVID-19 — high risk shielded patient list identification methodology: rule logic. 2020. 13/09/2021, at [https://digital.nhs.uk/coronavirus/shielded-patient-list/methodology/rule-logic.](https://digital.nhs.uk/coronavirus/shielded-patient-list/methodology/rule-logic))
5. PRIMIS COVID-19. 2021. (Accessed 26/08/2021, at [https://www.nottingham.ac.uk/primis/covid-19/covid-19.aspx.](https://www.nottingham.ac.uk/primis/covid-19/covid-19.aspx))
6. Public Health England. COVID-19: the green book, chapter 14a Coronavirus (COVID-19) vaccination information for public health professionals. 2021.
